# Supplementary material
Source: Atypon-hosted journal article supplement (doi:10.1287/ijoc.2025.1203)
Supplement: ijoc.2025.1203.cd.zip [file detailed experimental results.pdf › 2025.1203-main/Comparative Results/detailed experimental results.pdf]

Table 1: Comparative results on SET-1 instances

| Instance            | V   | E <sub>p</sub> | E <sub>r</sub> | CB&B  |         | LA-B&B |         | ILS-VND |          | ALS   |          | RLS   |          |
|---------------------|-----|----------------|----------------|-------|---------|--------|---------|---------|----------|-------|----------|-------|----------|
|                     |     |                |                | BKV   | time(s) | BKV    | time(s) | BKV     | htime(s) | BKV   | htime(s) | BKV   | htime(s) |
| p = 0.25, Setting 1 |     |                |                |       |         |        |         |         |          |       |          |       |          |
| brock200.2.A        | 200 | 7,416          | 2,460          | 986   | 280     | 986    | 2       | 986     | <1       | 986   | <1       | 986   | <1       |
| brock400.2.A        | 400 | 44,847         | 14,939         | 765   | 441     | 765    | 1       | 765     | <1       | 765   | <1       | 765   | <1       |
| C125.9.A            | 125 | 5,250          | 1,713          | 454   | <1      | 454    | <1      | 454     | <1       | 454   | <1       | 454   | <1       |
| C250.9.A            | 250 | 20,940         | 7,044          | 581   | 10      | 581    | <1      | 581     | <1       | 581   | <1       | 581   | <1       |
| gen200.p0.9.55.A    | 200 | 13,434         | 4,176          | 535   | 4       | 535    | <1      | 535     | <1       | 535   | <1       | 535   | <1       |
| gen400.p0.9.75.A    | 400 | 53,671         | 18,149         | 628   | 82      | 628    | <1      | 628     | 3        | 628   | <1       | 628   | <1       |
| hamming8-4.A        | 256 | 15,580         | 5,284          | 1,094 | 240     | 1,094  | <1      | 1,094   | <1       | 1,094 | <1       | 1,094 | <1       |
| keller4.A           | 171 | 7,057          | 2,378          | 941   | 15      | 941    | <1      | 941     | <1       | 941   | <1       | 941   | <1       |
| MANN.a27.A          | 378 | 53,050         | 17,501         | 533   | 28      | 533    | <1      | 533     | <1       | 533   | <1       | 533   | <1       |
| p.hat300-1.A        | 300 | 8,239          | 2,694          | 2,308 | 10,800  | 2,680  | 10,800  | 2,744   | <1       | 2,744 | <1       | 2,744 | <1       |
| p.hat300-2.A        | 300 | 16,403         | 5,525          | 2,076 | 5,182   | 2,076  | 608     | 2,076   | <1       | 2,076 | <1       | 2,076 | <1       |
| p.hat300-3.A        | 300 | 25,132         | 8,258          | 739   | 100     | 739    | <1      | 739     | <1       | 739   | <1       | 739   | <1       |
| brock200.2.B        | 200 | 7,416          | 2,460          | 962   | 276     | 962    | 2       | 962     | <1       | 962   | <1       | 962   | <1       |
| brock400.2.B        | 400 | 44,847         | 14,939         | 741   | 445     | 741    | 1       | 741     | <1       | 741   | <1       | 741   | <1       |
| C125.9.B            | 125 | 5,250          | 1,713          | 437   | 1       | 437    | <1      | 437     | <1       | 437   | <1       | 437   | <1       |
| C250.9.B            | 250 | 20,940         | 7,044          | 549   | 11      | 549    | <1      | 549     | <1       | 549   | <1       | 549   | <1       |
| gen200.p0.9.55.B    | 200 | 13,434         | 4,176          | 510   | 5       | 510    | <1      | 510     | <1       | 510   | <1       | 510   | <1       |
| gen400.p0.9.75.B    | 400 | 53,671         | 18,149         | 595   | 80      | 595    | <1      | 595     | <1       | 595   | <1       | 595   | <1       |
| hamming8-4.B        | 256 | 15,580         | 5,284          | 1,094 | 234     | 1,094  | <1      | 1,094   | <1       | 1,094 | <1       | 1,094 | <1       |
| keller4.B           | 171 | 7,057          | 2,378          | 941   | 15      | 941    | <1      | 941     | <1       | 941   | <1       | 941   | <1       |
| MANN.a27.B          | 378 | 53,050         | 17,501         | 503   | 31      | 503    | <1      | 503     | <1       | 503   | <1       | 503   | <1       |
| p.hat300-1.B        | 300 | 8,239          | 2,694          | 2,259 | 10,800  | 2,643  | 10,800  | 2,712   | <1       | 2,712 | <1       | 2,712 | <1       |
| p.hat300-2.B        | 300 | 16,403         | 5,525          | 2,062 | 5,194   | 2,062  | 680     | 2,062   | <1       | 2,062 | <1       | 2,062 | <1       |
| p.hat300-3.B        | 300 | 25,132         | 8,258          | 713   | 102     | 713    | <1      | 713     | <1       | 713   | <1       | 713   | <1       |
| brock200.2.C        | 200 | 7,416          | 2,460          | 932   | 280     | 932    | 2       | 932     | <1       | 932   | <1       | 932   | <1       |
| brock400.2.C        | 400 | 44,847         | 14,939         | 698   | 455     | 698    | 2       | 698     | <1       | 698   | <1       | 698   | <1       |
| C125.9.C            | 125 | 5,250          | 1,713          | 403   | 1       | 403    | <1      | 403     | <1       | 403   | <1       | 403   | <1       |
| C250.9.C            | 250 | 20,940         | 7,044          | 502   | 12      | 502    | <1      | 502     | <1       | 502   | <1       | 502   | <1       |
| gen200.p0.9.55.C    | 200 | 13,434         | 4,176          | 467   | 4       | 467    | <1      | 467     | <1       | 467   | <1       | 467   | <1       |
| gen400.p0.9.75.C    | 400 | 53,671         | 18,149         | 533   | 81      | 533    | <1      | 533     | <1       | 533   | <1       | 533   | <1       |
| hamming8-4.C        | 256 | 15,580         | 5,284          | 1,094 | 229     | 1,094  | 1       | 1,094   | <1       | 1,094 | <1       | 1,094 | <1       |
| keller4.C           | 171 | 7,057          | 2,378          | 941   | 14      | 941    | <1      | 941     | <1       | 941   | <1       | 941   | <1       |
| MANN.a27.C          | 378 | 53,050         | 17,501         | 443   | 30      | 443    | <1      | 443     | <1       | 443   | <1       | 443   | <1       |
| p.hat300-1.C        | 300 | 8,239          | 2,694          | 2,205 | 10,800  | 2,566  | 10,800  | 2,649   | <1       | 2,649 | <1       | 2,649 | <1       |
| p.hat300-2.C        | 300 | 16,403         | 5,525          | 2,033 | 5,360   | 2,033  | 778     | 2,033   | <1       | 2,033 | <1       | 2,033 | <1       |
| p.hat300-3.C        | 300 | 25,132         | 8,258          | 688   | 111     | 688    | <1      | 688     | <1       | 688   | <1       | 688   | <1       |
| p = 0.25, Setting 2 |     |                |                |       |         |        |         |         |          |       |          |       |          |
| brock200.2.A        | 200 | 7,416          | 2,460          | 1,489 | 452     | 1,489  | 5       | 1,489   | <1       | 1,489 | <1       | 1,489 | <1       |
| brock400.2.A        | 400 | 44,847         | 14,939         | 1,084 | 593     | 1,084  | 2       | 1,084   | 2        | 1,084 | <1       | 1,084 | <1       |
| C125.9.A            | 125 | 5,250          | 1,713          | 685   | 1       | 685    | <1      | 685     | <1       | 685   | <1       | 685   | <1       |
| C250.9.A            | 250 | 20,940         | 7,044          | 785   | 12      | 785    | <1      | 785     | <1       | 785   | <1       | 785   | <1       |
| gen200.p0.9.55.A    | 200 | 13,434         | 4,176          | 778   | 5       | 778    | <1      | 778     | <1       | 778   | <1       | 778   | <1       |
| gen400.p0.9.75.A    | 400 | 53,671         | 18,149         | 882   | 94      | 882    | <1      | 882     | <1       | 882   | <1       | 882   | <1       |
| hamming8-4.A        | 256 | 15,580         | 5,284          | 1,790 | 331     | 1,790  | 2       | 1,790   | <1       | 1,790 | <1       | 1,790 | <1       |
| keller4.A           | 171 | 7,057          | 2,378          | 1,500 | 23      | 1,500  | <1      | 1,500   | <1       | 1,500 | <1       | 1,500 | <1       |
| MANN.a27.A          | 378 | 53,050         | 17,501         | 683   | 32      | 683    | <1      | 683     | <1       | 683   | <1       | 683   | <1       |
| p.hat300-1.A        | 300 | 8,239          | 2,694          | 3,981 | 10,800  | 4,182  | 10,800  | 4,674   | 1        | 4,674 | <1       | 4,674 | <1       |
| p.hat300-2.A        | 300 | 16,403         | 5,525          | 2,994 | 8,743   | 2,994  | 9,402   | 2,994   | <1       | 2,994 | <1       | 2,994 | <1       |
| p.hat300-3.A        | 300 | 25,132         | 8,258          | 1,180 | 137     | 1,180  | 1       | 1,180   | <1       | 1,180 | <1       | 1,180 | <1       |
| brock200.2.B        | 200 | 7,416          | 2,460          | 739   | 456     | 739    | 5       | 739     | <1       | 739   | <1       | 739   | <1       |
| brock400.2.B        | 400 | 44,847         | 14,939         | 534   | 611     | 534    | 2       | 534     | 2        | 534   | <1       | 534   | <1       |
| C125.9.B            | 125 | 5,250          | 1,713          | 335   | 1       | 335    | <1      | 335     | <1       | 335   | <1       | 335   | <1       |
| C250.9.B            | 250 | 20,940         | 7,044          | 385   | 13      | 385    | <1      | 385     | <1       | 385   | <1       | 385   | <1       |
| gen200.p0.9.55.B    | 200 | 13,434         | 4,176          | 378   | 5       | 378    | <1      | 378     | <1       | 378   | <1       | 378   | <1       |
| gen400.p0.9.75.B    | 400 | 53,671         | 18,149         | 432   | 96      | 432    | <1      | 432     | <1       | 432   | <1       | 432   | <1       |
| hamming8-4.B        | 256 | 15,580         | 5,284          | 890   | 333     | 890    | 2       | 890     | <1       | 890   | <1       | 890   | <1       |
| keller4.B           | 171 | 7,057          | 2,378          | 750   | 22      | 750    | <1      | 750     | <1       | 750   | <1       | 750   | <1       |
| MANN.a27.B          | 378 | 53,050         | 17,501         | 333   | 34      | 333    | <1      | 333     | <1       | 333   | <1       | 333   | <1       |
| p.hat300-1.B        | 300 | 8,239          | 2,694          | 1,981 | 10,800  | 2,082  | 10,800  | 2,324   | 2        | 2,324 | <1       | 2,324 | <1       |
| p.hat300-2.B        | 300 | 16,403         | 5,525          | 1,494 | 8,947   | 1,494  | 10,800  | 1,494   | <1       | 1,494 | <1       | 1,494 | <1       |
| p.hat300-3.B        | 300 | 25,132         | 8,258          | 580   | 134     | 580    | 1       | 580     | 1        | 580   | <1       | 580   | <1       |
| brock200.2.C        | 200 | 7,416          | 2,460          | 364   | 460     | 364    | 5       | 364     | <1       | 364   | <1       | 364   | <1       |
| brock400.2.C        | 400 | 44,847         | 14,939         | 259   | 646     | 259    | 2       | 259     | 1        | 259   | <1       | 259   | <1       |
| C125.9.C            | 125 | 5,250          | 1,713          | 160   | 1       | 160    | <1      | 160     | <1       | 160   | <1       | 160   | <1       |
| C250.9.C            | 250 | 20,940         | 7,044          | 185   | 13      | 185    | <1      | 185     | <1       | 185   | <1       | 185   | <1       |
| gen200.p0.9.55.C    | 200 | 13,434         | 4,176          | 178   | 5       | 178    | <1      | 178     | <1       | 178   | <1       | 178   | <1       |
| gen400.p0.9.75.C    | 400 | 53,671         | 18,149         | 207   | 98      | 207    | <1      | 207     | <1       | 207   | <1       | 207   | <1       |
| hamming8-4.C        | 256 | 15,580         | 5,284          | 440   | 355     | 440    | 2       | 440     | <1       | 440   | <1       | 440   | <1       |
| keller4.C           | 171 | 7,057          | 2,378          | 375   | 23      | 375    | <1      | 375     | <1       | 375   | <1       | 375   | <1       |
| MANN.a27.C          | 378 | 53,050         | 17,501         | 158   | 33      | 158    | <1      | 158     | <1       | 158   | <1       | 158   | <1       |
| p.hat300-1.C        | 300 | 8,239          | 2,694          | 981   | 10,800  | 1,032  | 10,800  | 1,149   | 1        | 1,149 | <1       | 1,149 | <1       |
| p.hat300-2.C        | 300 | 16,403         | 5,525          | 744   | 10,800  | 744    | 10,658  | 744     | <1       | 744   | <1       | 744   | <1       |
| p.hat300-3.C        | 300 | 25,132         | 8,258          | 280   | 142     | 280    | <1      | 280     | <1       | 280   | <1       | 280   | <1       |
| p = 0.50, Setting 1 |     |                |                |       |         |        |         |         |          |       |          |       |          |
| brock200.2.A        | 200 | 4,916          | 4,960          | 1,298 | 8,390   | 1,298  | 93      | 1,298   | <1       | 1,298 | <1       | 1,298 | <1       |
| brock400.2.A        | 400 | 29,711         | 30,075         | 1,103 | 10,800  | 1,123  | 355     | 1,123   | <1       | 1,123 | <1       | 1,123 | <1       |
| C125.9.A            | 125 | 3,500          | 3,463          | 627   | 5       | 627    | <1      | 627     | <1       | 627   | <1       | 627   | <1       |
| C250.9.A            | 250 | 14,017         | 13,967         | 817   | 266     | 817    | 1       | 817     | <1       | 817   | <1       | 817   | <1       |
| gen200.p0.9.55.A    | 200 | 8,908          | 9,002          | 785   | 68      | 785    | <1      | 785     | <1       | 785   | <1       | 785   | <1       |
| gen400.p0.9.75.A    | 400 | 35,823         | 35,997         | 895   | 5,699   | 895    | 29      | 895     | <1       | 895   | <1       | 895   | <1       |
| hamming8-4.A        | 256 | 10,329         | 10,535         | 1,301 | 7,608   | 1,301  | 49      | 1,301   | <1       | 1,301 | <1       | 1,301 | <1       |
| keller4.A           | 171 | 4,738          | 4,697          | 1,118 | 153     | 1,118  | 2       | 1,118   | <1       | 1,118 | <1       | 1,118 | <1       |
| MANN.a27.A          | 378 | 35,345         | 35,206         | 812   | 1,217   | 812    | 6       | 812     | <1       | 812   | <1       | 812   | <1       |
| p.hat300-1.A        | 300 | 5,505          | 5,428          | 2,568 | 10,800  | 3,026  | 10,800  | 3,129   | <1       | 3,129 | <1       | 3,129 | <1       |
| p.hat300-2.A        | 300 | 11,051         | 10,877         | 2,063 | 10,800  | 2,477  | 10,800  | 2,477   | <1       | 2,477 | <1       | 2,477 | <1       |
| p.hat300-3.A        | 300 | 16,820         | 16,570         | 1,029 | 3,748   | 1,029  | 38      | 1,029   | <1       | 1,029 | <1       | 1,029 | <1       |

Continued on next page

Table 1 – Continued from previous page

| Instance            | V   | E <sub>p</sub> | E <sub>r</sub> | CB&B  |         | LA-B&B |         | ILS-VND |          | ALS   |          | RLS   |          |
|---------------------|-----|----------------|----------------|-------|---------|--------|---------|---------|----------|-------|----------|-------|----------|
|                     |     |                |                | BKV   | time(s) | BKV    | time(s) | BKV     | htime(s) | BKV   | htime(s) | BKV   | htime(s) |
| brock200.2.B        | 200 | 4,916          | 4,960          | 1,224 | 9,589   | 1,224  | 125     | 1,224   | <1       | 1,224 | <1       | 1,224 | <1       |
| brock400.2.B        | 400 | 29,711         | 30,075         | 1,010 | 10,800  | 1,035  | 445     | 1,035   | <1       | 1,035 | <1       | 1,035 | <1       |
| C125.9.B            | 125 | 3,500          | 3,463          | 582   | 5       | 582    | <1      | 582     | <1       | 582   | <1       | 582   | <1       |
| C250.9.B            | 250 | 14,017         | 13,967         | 744   | 292     | 744    | 2       | 744     | <1       | 744   | <1       | 744   | <1       |
| gen200.p0.9.55.B    | 200 | 8,908          | 9,002          | 716   | 72      | 716    | <1      | 716     | <1       | 716   | <1       | 716   | <1       |
| gen400.p0.9.75.B    | 400 | 35,823         | 35,997         | 805   | 6,602   | 805    | 34      | 805     | <1       | 805   | <1       | 805   | <1       |
| hamming8.4.B        | 256 | 10,329         | 10,535         | 1,255 | 7,780   | 1,255  | 62      | 1,255   | <1       | 1,255 | <1       | 1,255 | <1       |
| keller4.B           | 171 | 4,738          | 4,697          | 1,094 | 156     | 1,094  | 2       | 1,094   | <1       | 1,094 | <1       | 1,094 | <1       |
| MANN.a27.B          | 378 | 35,345         | 35,206         | 707   | 1,417   | 707    | 7       | 707     | 1        | 707   | <1       | 707   | <1       |
| p.hat300.1.B        | 300 | 5,505          | 5,428          | 2,492 | 10,800  | 2,950  | 10,800  | 3,023   | <1       | 3,023 | <1       | 3,023 | <1       |
| p.hat300.2.B        | 300 | 11,051         | 10,877         | 1,979 | 10,800  | 2,405  | 10,800  | 2,405   | <1       | 2,405 | <1       | 2,405 | <1       |
| p.hat300.3.B        | 300 | 16,820         | 16,570         | 967   | 4,067   | 967    | 46      | 967     | <1       | 967   | <1       | 967   | <1       |
| brock200.2.C        | 200 | 4,916          | 4,960          | 1,101 | 10,800  | 1,101  | 204     | 1,101   | <1       | 1,101 | <1       | 1,101 | <1       |
| brock400.2.C        | 400 | 29,711         | 30,075         | 861   | 10,800  | 892    | 691     | 892     | <1       | 892   | <1       | 892   | <1       |
| C125.9.C            | 125 | 3,500          | 3,463          | 506   | 6       | 506    | <1      | 506     | <1       | 506   | <1       | 506   | <1       |
| C250.9.C            | 250 | 14,017         | 13,967         | 623   | 334     | 623    | 2       | 623     | <1       | 623   | <1       | 623   | <1       |
| gen200.p0.9.55.C    | 200 | 8,908          | 9,002          | 597   | 91      | 597    | <1      | 597     | <1       | 597   | <1       | 597   | <1       |
| gen400.p0.9.75.C    | 400 | 35,823         | 35,997         | 651   | 7,858   | 651    | 50      | 651     | <1       | 651   | <1       | 651   | <1       |
| hamming8.4.C        | 256 | 10,329         | 10,535         | 1,184 | 7,447   | 1,184  | 85      | 1,184   | <1       | 1,184 | <1       | 1,184 | <1       |
| keller4.C           | 171 | 4,738          | 4,697          | 1,049 | 145     | 1,049  | 3       | 1,049   | <1       | 1,049 | <1       | 1,049 | <1       |
| MANN.a27.C          | 378 | 35,345         | 35,206         | 552   | 1,849   | 552    | 10      | 552     | 1        | 552   | <1       | 552   | <1       |
| p.hat300.1.C        | 300 | 5,505          | 5,428          | 2,303 | 10,800  | 2,818  | 10,800  | 2,897   | <1       | 2,897 | <1       | 2,897 | <1       |
| p.hat300.2.C        | 300 | 11,051         | 10,877         | 1,852 | 10,800  | 2,263  | 10,800  | 2,263   | <1       | 2,263 | <1       | 2,263 | <1       |
| p.hat300.3.C        | 300 | 16,820         | 16,570         | 851   | 4,709   | 851    | 69      | 851     | <1       | 851   | <1       | 851   | <1       |
| p = 0.50, Setting 2 |     |                |                |       |         |        |         |         |          |       |          |       |          |
| brock200.2.A        | 200 | 4,916          | 4,960          | 2,034 | 10,800  | 2,034  | 677     | 2,034   | <1       | 2,034 | <1       | 2,034 | <1       |
| brock400.2.A        | 400 | 29,711         | 30,075         | 1,628 | 10,800  | 1,630  | 1,323   | 1,630   | 11       | 1,630 | <1       | 1,630 | <1       |
| C125.9.A            | 125 | 3,500          | 3,463          | 1,152 | 7       | 1,152  | <1      | 1,152   | <1       | 1,152 | <1       | 1,152 | <1       |
| C250.9.A            | 250 | 14,017         | 13,967         | 1,236 | 343     | 1,236  | 3       | 1,236   | 3        | 1,236 | <1       | 1,236 | <1       |
| gen200.p0.9.55.A    | 200 | 8,908          | 9,002          | 1,151 | 113     | 1,151  | <1      | 1,151   | 3        | 1,151 | <1       | 1,151 | <1       |
| gen400.p0.9.75.A    | 400 | 35,823         | 35,997         | 1,335 | 8,467   | 1,335  | 69      | 1,335   | 2        | 1,335 | <1       | 1,335 | <1       |
| hamming8.4.A        | 256 | 10,329         | 10,535         | 2,155 | 10,800  | 2,155  | 166     | 2,155   | 1        | 2,155 | <1       | 2,155 | <1       |
| keller4.A           | 171 | 4,738          | 4,697          | 1,759 | 353     | 1,759  | 5       | 1,759   | <1       | 1,759 | <1       | 1,759 | <1       |
| MANN.a27.A          | 378 | 35,345         | 35,206         | 1,226 | 1,950   | 1,226  | 10      | 1,226   | 12       | 1,226 | <1       | 1,226 | <1       |
| p.hat300.1.A        | 300 | 5,505          | 5,428          | 4,740 | 10,800  | 5,637  | 10,800  | 5,637   | <1       | 5,637 | <1       | 5,637 | <1       |
| p.hat300.2.A        | 300 | 11,051         | 10,877         | 3,342 | 10,800  | 3,750  | 10,800  | 3,943   | <1       | 3,943 | <1       | 3,943 | <1       |
| p.hat300.3.A        | 300 | 16,820         | 16,570         | 1,658 | 7,243   | 1,658  | 157     | 1,658   | <1       | 1,658 | <1       | 1,658 | <1       |
| brock200.2.B        | 200 | 4,916          | 4,960          | 984   | 10,800  | 984    | 757     | 984     | <1       | 984   | <1       | 984   | <1       |
| brock400.2.B        | 400 | 29,711         | 30,075         | 765   | 10,800  | 780    | 1,385   | 780     | 10       | 780   | <1       | 780   | <1       |
| C125.9.B            | 125 | 3,500          | 3,463          | 552   | 7       | 552    | <1      | 552     | <1       | 552   | <1       | 552   | <1       |
| C250.9.B            | 250 | 14,017         | 13,967         | 586   | 391     | 586    | 3       | 586     | 4        | 586   | <1       | 586   | <1       |
| gen200.p0.9.55.B    | 200 | 8,908          | 9,002          | 551   | 121     | 551    | <1      | 551     | 1        | 551   | <1       | 551   | <1       |
| gen400.p0.9.75.B    | 400 | 35,823         | 35,997         | 635   | 9,395   | 635    | 72      | 635     | <1       | 635   | <1       | 635   | <1       |
| hamming8.4.B        | 256 | 10,329         | 10,535         | 1,055 | 10,800  | 1,055  | 163     | 1,055   | <1       | 1,055 | <1       | 1,055 | <1       |
| keller4.B           | 171 | 4,738          | 4,697          | 859   | 367     | 859    | 5       | 859     | <1       | 859   | <1       | 859   | <1       |
| MANN.a27.B          | 378 | 35,345         | 35,206         | 576   | 2,161   | 576    | 11      | 576     | 13       | 576   | <1       | 576   | <1       |
| p.hat300.1.B        | 300 | 5,505          | 5,428          | 2,340 | 10,800  | 2,325  | 10,800  | 2,787   | <1       | 2,787 | <1       | 2,787 | <1       |
| p.hat300.2.B        | 300 | 11,051         | 10,877         | 1,642 | 10,800  | 1,850  | 10,800  | 1,943   | <1       | 1,943 | <1       | 1,943 | <1       |
| p.hat300.3.B        | 300 | 16,820         | 16,570         | 808   | 7,790   | 808    | 161     | 808     | <1       | 808   | <1       | 808   | <1       |
| brock200.2.C        | 200 | 4,916          | 4,960          | 459   | 10,800  | 459    | 934     | 459     | <1       | 459   | <1       | 459   | <1       |
| brock400.2.C        | 400 | 29,711         | 30,075         | 341   | 10,800  | 355    | 1,711   | 355     | 12       | 355   | <1       | 355   | <1       |
| C125.9.C            | 125 | 3,500          | 3,463          | 252   | 8       | 252    | <1      | 252     | <1       | 252   | <1       | 252   | <1       |
| C250.9.C            | 250 | 14,017         | 13,967         | 261   | 501     | 261    | 3       | 261     | 3        | 261   | <1       | 261   | <1       |
| gen200.p0.9.55.C    | 200 | 8,908          | 9,002          | 251   | 146     | 251    | 1       | 251     | 2        | 251   | <1       | 251   | <1       |
| gen400.p0.9.75.C    | 400 | 35,823         | 35,997         | 285   | 10,800  | 285    | 83      | 285     | 2        | 285   | <1       | 285   | <1       |
| hamming8.4.C        | 256 | 10,329         | 10,535         | 505   | 10,800  | 505    | 170     | 505     | <1       | 505   | <1       | 505   | <1       |
| keller4.C           | 171 | 4,738          | 4,697          | 409   | 389     | 409    | 5       | 409     | <1       | 409   | <1       | 409   | <1       |
| MANN.a27.C          | 378 | 35,345         | 35,206         | 251   | 2,666   | 251    | 13      | 251     | 10       | 251   | <1       | 251   | <1       |
| p.hat300.1.C        | 300 | 5,505          | 5,428          | 1,138 | 10,800  | 1,125  | 10,800  | 1,362   | <1       | 1,362 | <1       | 1,362 | <1       |
| p.hat300.2.C        | 300 | 11,051         | 10,877         | 788   | 10,800  | 900    | 10,800  | 943     | <1       | 943   | <1       | 943   | <1       |
| p.hat300.3.C        | 300 | 16,820         | 16,570         | 383   | 9,014   | 383    | 178     | 383     | <1       | 383   | <1       | 383   | <1       |
| p = 0.75, Setting 1 |     |                |                |       |         |        |         |         |          |       |          |       |          |
| brock200.2.A        | 200 | 2,438          | 7,438          | 1,615 | 10,800  | 1,851  | 10,800  | 1,885   | <1       | 1,885 | <1       | 1,885 | <1       |
| brock400.2.A        | 400 | 14,751         | 45,035         | 1,403 | 10,800  | 1,667  | 10,800  | 1,728   | 5        | 1,728 | <1       | 1,728 | <1       |
| C125.9.A            | 125 | 1,733          | 5,230          | 1,023 | 247     | 1,023  | 4       | 1,023   | <1       | 1,023 | <1       | 1,023 | <1       |
| C250.9.A            | 250 | 7,073          | 20,911         | 1,200 | 10,800  | 1,236  | 5,143   | 1,236   | 2        | 1,236 | <1       | 1,236 | <1       |
| gen200.p0.9.55.A    | 200 | 4,425          | 13,485         | 1,186 | 10,800  | 1,206  | 601     | 1,206   | <1       | 1,206 | <1       | 1,206 | <1       |
| gen400.p0.9.75.A    | 400 | 18,063         | 53,757         | 1,155 | 10,800  | 1,490  | 10,800  | 1,490   | <1       | 1,490 | <1       | 1,490 | <1       |
| hamming8.4.A        | 256 | 5,173          | 15,691         | 1,549 | 10,800  | 1,723  | 10,800  | 1,759   | <1       | 1,759 | <1       | 1,759 | <1       |
| keller4.A           | 171 | 2,400          | 7,035          | 1,400 | 10,800  | 1,434  | 1573    | 1,434   | <1       | 1,434 | <1       | 1,434 | <1       |
| MANN.a27.A          | 378 | 17,580         | 52,971         | 1,313 | 10,800  | 1,323  | 10,800  | 1,323   | <1       | 1,323 | <1       | 1,323 | <1       |
| p.hat300.1.A        | 300 | 2,734          | 8,199          | 2,504 | 10,800  | 3,932  | 10,800  | 4,164   | <1       | 4,164 | <1       | 4,164 | <1       |
| p.hat300.2.A        | 300 | 5,603          | 16,325         | 2,120 | 10,800  | 2,902  | 10,800  | 2,990   | 1        | 2,990 | <1       | 2,990 | <1       |
| p.hat300.3.A        | 300 | 8,388          | 25,002         | 1,350 | 10,800  | 1,561  | 10,800  | 1,564   | <1       | 1,564 | <1       | 1,564 | <1       |
| brock200.2.B        | 200 | 2,438          | 7,438          | 1,416 | 10,800  | 1,602  | 10,800  | 1,641   | <1       | 1,641 | <1       | 1,641 | <1       |
| brock400.2.B        | 400 | 14,751         | 45,035         | 1,129 | 10,800  | 1,341  | 10,800  | 1,386   | 2        | 1,386 | <1       | 1,386 | <1       |
| C125.9.B            | 125 | 1,733          | 5,230          | 856   | 395     | 856    | 8       | 856     | <1       | 856   | <1       | 856   | <1       |
| C250.9.B            | 250 | 7,073          | 20,911         | 960   | 10,800  | 1,001  | 10,800  | 1,001   | 1        | 1,001 | <1       | 1,001 | <1       |
| gen200.p0.9.55.B    | 200 | 4,425          | 13,485         | 961   | 10,800  | 983    | 1585    | 983     | <1       | 983   | <1       | 983   | <1       |
| gen400.p0.9.75.B    | 400 | 18,063         | 53,757         | 920   | 10,800  | 1,105  | 10,800  | 1,120   | <1       | 1,120 | <1       | 1,120 | <1       |
| hamming8.4.B        | 256 | 5,173          | 15,691         | 1,356 | 10,800  | 1,486  | 10,800  | 1,579   | <1       | 1,579 | <1       | 1,579 | <1       |
| keller4.B           | 171 | 2,400          | 7,035          | 1,230 | 10,800  | 1,268  | 4468    | 1,268   | <1       | 1,268 | <1       | 1,268 | <1       |
| MANN.a27.B          | 378 | 17,580         | 52,971         | 922   | 10,800  | 1,011  | 10,800  | 1,021   | <1       | 1,021 | <1       | 1,021 | <1       |
| p.hat300.1.B        | 300 | 2,73           |                |       |         |        |         |         |          |       |          |       |          |

Table 1 – Continued from previous page

| Instance                   | $ V $ | $ E_p $ | $ E_r $ | CB&B         |         | LA-B&B       |         | ILS-VND      |          | ALS          |          | RLS          |          |
|----------------------------|-------|---------|---------|--------------|---------|--------------|---------|--------------|----------|--------------|----------|--------------|----------|
|                            |       |         |         | BKV          | time(s) | BKV          | time(s) | BKV          | htime(s) | BKV          | htime(s) | BKV          | htime(s) |
| C125.9.C                   | 125   | 1,733   | 5,230   | <b>644</b>   | 10,800  | <b>644</b>   | 45      | <b>644</b>   | <1       | <b>644</b>   | <1       | <b>644</b>   | <1       |
| C250.9.C                   | 250   | 7,073   | 20,911  | 688          | 10,800  | <b>734</b>   | 10,800  | <b>734</b>   | 1        | <b>734</b>   | <1       | <b>734</b>   | <1       |
| gen200_p0.9.55.C           | 200   | 4,425   | 13,485  | 707          | 10,800  | <b>727</b>   | 9,879   | <b>727</b>   | <1       | <b>727</b>   | <1       | <b>727</b>   | <1       |
| gen400_p0.9.75.C           | 400   | 18,063  | 53,757  | 613          | 10,800  | 756          | 10,800  | <b>772</b>   | 1        | <b>772</b>   | <1       | <b>772</b>   | <1       |
| hamming8-4.C               | 256   | 5,173   | 15,691  | 1,120        | 10,800  | 1,248        | 10,800  | <b>1,378</b> | <1       | <b>1,378</b> | <1       | <b>1,378</b> | <1       |
| keller4.C                  | 171   | 2,400   | 7,035   | 1,060        | 10,800  | <b>1,109</b> | 10,800  | <b>1,109</b> | <1       | <b>1,109</b> | <1       | <b>1,109</b> | <1       |
| MANN_a27.C                 | 378   | 17,580  | 52,971  | 583          | 10,800  | 648          | 10,800  | <b>651</b>   | 2        | <b>651</b>   | <1       | <b>651</b>   | <1       |
| p_hat300-1.C               | 300   | 2,734   | 8,199   | 1,866        | 10,800  | 3,191        | 10,800  | <b>3,480</b> | <1       | <b>3,480</b> | <1       | <b>3,480</b> | <1       |
| p_hat300-2.C               | 300   | 5,603   | 16,325  | 1,511        | 10,800  | 2,249        | 10,800  | <b>2,473</b> | <1       | <b>2,473</b> | <1       | <b>2,473</b> | <1       |
| p_hat300-3.C               | 300   | 8,388   | 25,002  | 886          | 10,800  | 919          | 10,800  | <b>1,004</b> | <1       | <b>1,004</b> | <1       | <b>1,004</b> | <1       |
| <i>p</i> = 0.75, Setting 2 |       |         |         |              |         |              |         |              |          |              |          |              |          |
| brock200.2.A               | 200   | 2,438   | 7,438   | 2,999        | 10,800  | 3,078        | 10,800  | <b>3,326</b> | 8        | <b>3,326</b> | <1       | <b>3,326</b> | <1       |
| brock400.2.A               | 400   | 14,751  | 45,035  | 2,603        | 10,800  | 2,787        | 10,800  | <b>2,941</b> | 12       | <b>2,941</b> | 1        | <b>2,941</b> | 3        |
| C125.9.A                   | 125   | 1,733   | 5,230   | <b>1,837</b> | 365     | <b>1,837</b> | 62.71   | <b>1,837</b> | <1       | <b>1,837</b> | <1       | <b>1,837</b> | <1       |
| C250.9.A                   | 250   | 7,073   | 20,911  | 2,011        | 10,800  | <b>2,171</b> | 10,800  | <b>2,171</b> | 5        | <b>2,171</b> | <1       | <b>2,171</b> | <1       |
| gen200_p0.9.55.A           | 200   | 4,425   | 13,485  | 2,094        | 10,800  | <b>2,096</b> | 7,832   | <b>2,096</b> | <1       | <b>2,096</b> | <1       | <b>2,096</b> | <1       |
| gen400_p0.9.75.A           | 400   | 18,063  | 53,757  | 2,164        | 10,800  | 2,310        | 10,800  | <b>2,404</b> | 19       | <b>2,404</b> | <1       | <b>2,404</b> | 1        |
| hamming8-4.A               | 256   | 5,173   | 15,691  | 2,813        | 10,800  | <b>3,124</b> | 10,800  | <b>3,124</b> | 1        | <b>3,124</b> | <1       | <b>3,124</b> | <1       |
| keller4.A                  | 171   | 2,400   | 7,035   | 2,532        | 10,800  | <b>2,690</b> | 10,800  | <b>2,690</b> | <1       | <b>2,690</b> | <1       | <b>2,690</b> | <1       |
| MANN_a27.A                 | 378   | 17,580  | 52,971  | 1,976        | 10,800  | 2,206        | 10,800  | <b>2,208</b> | <1       | <b>2,208</b> | <1       | <b>2,208</b> | <1       |
| p_hat300-1.A               | 300   | 2,734   | 8,199   | 5,566        | 10,800  | 6,666        | 10,800  | <b>7,899</b> | 25       | <b>7,899</b> | <1       | <b>7,899</b> | <1       |
| p_hat300-2.A               | 300   | 5,603   | 16,325  | 4,102        | 10,800  | 4,714        | 10,800  | <b>5,343</b> | <1       | <b>5,343</b> | <1       | <b>5,343</b> | <1       |
| p_hat300-3.A               | 300   | 8,388   | 25,002  | 2,477        | 10,800  | 2,658        | 10,800  | <b>2,838</b> | 2        | <b>2,838</b> | <1       | <b>2,838</b> | <1       |
| brock200.2.B               | 200   | 2,438   | 7,438   | 1,398        | 10,800  | 1,427        | 10,800  | <b>1,533</b> | <1       | <b>1,533</b> | <1       | <b>1,533</b> | <1       |
| brock400.2.B               | 400   | 14,751  | 45,035  | 1,161        | 10,800  | 1,210        | 10,800  | <b>1,291</b> | 16       | <b>1,291</b> | 1        | <b>1,291</b> | 4        |
| C125.9.B                   | 125   | 1,733   | 5,230   | <b>837</b>   | 523     | <b>837</b>   | 84      | <b>837</b>   | <1       | <b>837</b>   | <1       | <b>837</b>   | <1       |
| C250.9.B                   | 250   | 7,073   | 20,911  | 911          | 10,800  | 969          | 10,800  | <b>971</b>   | 3        | <b>971</b>   | <1       | <b>971</b>   | <1       |
| gen200_p0.9.55.B           | 200   | 4,425   | 13,485  | 944          | 10,800  | <b>946</b>   | 10,800  | <b>946</b>   | <1       | <b>946</b>   | <1       | <b>946</b>   | <1       |
| gen400_p0.9.75.B           | 400   | 18,063  | 53,757  | 936          | 10,800  | 1,010        | 10,800  | 1,052        | 11       | <b>1,054</b> | 1        | <b>1,054</b> | 1        |
| hamming8-4.B               | 256   | 5,173   | 15,691  | 1,309        | 10,800  | <b>1,474</b> | 10,800  | <b>1,474</b> | <1       | <b>1,474</b> | <1       | <b>1,474</b> | <1       |
| keller4.B                  | 171   | 2,400   | 7,035   | 1,190        | 10,800  | 1,240        | 10,800  | <b>1,254</b> | <1       | <b>1,254</b> | <1       | <b>1,254</b> | <1       |
| MANN_a27.B                 | 378   | 17,580  | 52,971  | 875          | 10,800  | 956          | 10,800  | <b>958</b>   | 11       | <b>958</b>   | <1       | <b>958</b>   | <1       |
| p_hat300-1.B               | 300   | 2,734   | 8,199   | 2,666        | 10,800  | 3,216        | 10,800  | <b>3,818</b> | 2        | <b>3,818</b> | <1       | <b>3,818</b> | <1       |
| p_hat300-2.B               | 300   | 5,603   | 16,325  | 1,952        | 10,800  | 2,177        | 10,800  | <b>2,543</b> | <1       | <b>2,543</b> | <1       | <b>2,543</b> | <1       |
| p_hat300-3.B               | 300   | 8,388   | 25,002  | 1,101        | 10,800  | 1,208        | 10,800  | <b>1,288</b> | 2        | <b>1,288</b> | <1       | <b>1,288</b> | <1       |
| brock200.2.C               | 200   | 2,438   | 7,438   | 607          | 10,800  | 607          | 10,800  | <b>658</b>   | <1       | <b>658</b>   | <1       | <b>658</b>   | <1       |
| brock400.2.C               | 400   | 14,751  | 45,035  | 461          | 10,800  | 465          | 10,800  | <b>500</b>   | 3        | <b>500</b>   | <1       | <b>500</b>   | <1       |
| C125.9.C                   | 125   | 1,733   | 5,230   | <b>337</b>   | 1,519   | <b>337</b>   | 204     | <b>337</b>   | <1       | <b>337</b>   | <1       | <b>337</b>   | <1       |
| C250.9.C                   | 250   | 7,073   | 20,911  | 359          | 10,800  | 370          | 10,800  | <b>372</b>   | 5        | <b>372</b>   | <1       | <b>372</b>   | <1       |
| gen200_p0.9.55.C           | 200   | 4,425   | 13,485  | 352          | 10,800  | <b>371</b>   | 10,800  | <b>371</b>   | <1       | <b>371</b>   | <1       | <b>371</b>   | <1       |
| gen400_p0.9.75.C           | 400   | 18,063  | 53,757  | 356          | 10,800  | 379          | 10,800  | <b>395</b>   | 16       | <b>395</b>   | <1       | <b>395</b>   | <1       |
| hamming8-4.C               | 256   | 5,173   | 15,691  | 556          | 10,800  | 649          | 10,800  | <b>652</b>   | <1       | <b>652</b>   | <1       | <b>652</b>   | <1       |
| keller4.C                  | 171   | 2,400   | 7,035   | 510          | 10,800  | 554          | 10,800  | <b>558</b>   | <1       | <b>558</b>   | <1       | <b>558</b>   | <1       |
| MANN_a27.C                 | 378   | 17,580  | 52,971  | 325          | 10,800  | <b>335</b>   | 10,800  | <b>335</b>   | 11       | <b>335</b>   | <1       | <b>335</b>   | <1       |
| p_hat300-1.C               | 300   | 2,734   | 8,199   | 1,205        | 10,800  | 1,491        | 10,800  | <b>1,793</b> | 1        | <b>1,793</b> | <1       | <b>1,793</b> | <1       |
| p_hat300-2.C               | 300   | 5,603   | 16,325  | 854          | 10,800  | 981          | 10,800  | <b>1,159</b> | <1       | <b>1,159</b> | <1       | <b>1,159</b> | <1       |
| p_hat300-3.C               | 300   | 8,388   | 25,002  | 453          | 10,800  | 494          | 10,800  | <b>529</b>   | 1        | <b>529</b>   | <1       | <b>529</b>   | <1       |

The detailed comparative results on SET-2 and SET-3 are presented in Tables 2 and 3. The first four columns list instance information. The remaining columns show the best-known objective value ( $BKV$ ), the number of vertices in the  $BKV$  solution ( $|V_I|$ ), the mean running time for the heuristic algorithm to first hit the  $BKV$  ( $htime$ ), the kernel graph size ( $|V_{ker}|$ ) and the time of generating a kernel ( $time_{ker}$ ). The last two rows report statistical results. Values marked with \* denote the optimal objective value. Note that RLS's  $htime$  includes the pre-processing time for building graph kernels. The detailed ablation results on SET-2 and SET-3 are presented in Tables 4.

Table 2 Comparative results of RLS on SET-2 instances

| Instance                   | V      | $ E_p $   | $ E_r $   | CPLEX           |         |          | LA-B&B      |         |          | ALS            |         |          | RLS             |         |          |                   |                         |
|----------------------------|--------|-----------|-----------|-----------------|---------|----------|-------------|---------|----------|----------------|---------|----------|-----------------|---------|----------|-------------------|-------------------------|
|                            |        |           |           | BKV             | $ V_f $ | htime(s) | BKV         | $ V_f $ | htime(s) | BKV            | $ V_f $ | htime(s) | BKV             | $ V_f $ | htime(s) | $ V_{\text{set}}$ | time <sub>tot</sub> (s) |
| bio-yeast                  | 1,458  | 980       | 968       | <b>68,574*</b>  | 1,111   | <1       | 66,545      | 1,062   | 2        | 68,572         | 1,113   | 9        | <b>68,574*</b>  | 1,111   | <1       | 0                 | <1                      |
| soc-wiki-Vote              | 889    | 727       | 2,187     | <b>37,358*</b>  | 648     | <1       | 35,973      | 615     | <1       | <b>37,358*</b> | 648     | 8        | <b>37,358*</b>  | 648     | <1       | 0                 | <1                      |
| vc-exact.131               | 2,980  | 1,191     | 4,169     | <b>109,641*</b> | 2,098   | <1       | 107,812     | 2,045   | 14       | 109,392        | 2,121   | 14       | <b>109,641*</b> | 2,098   | <1       | 0                 | <1                      |
| web-edu                    | 3,031  | 4,813     | 1,661     | <b>114,140*</b> | 1,752   | <1       | 109,856     | 1,644   | 10       | 113,781        | 1,746   | 16       | <b>114,140*</b> | 1,753   | <1       | 98                | <1                      |
| MANN.a81                   | 3,321  | 3,118     | 3,362     | <b>117,327*</b> | 2,084   | <1       | 114,616     | 1,999   | 16       | 116,907        | 2,125   | 14       | <b>117,327*</b> | 2,084   | <1       | 0                 | <1                      |
| tech-routers-rf            | 2,113  | 1,539     | 5,093     | <b>97,799*</b>  | 1,668   | <1       | 93,690      | 1,588   | 54       | <b>97,799*</b> | 1,668   | 11       | <b>97,799*</b>  | 1,667   | <1       | 0                 | <1                      |
| vc-exact.039               | 6,795  | 2,574     | 8,046     | <b>259,542*</b> | 5,018   | <1       | 254,941     | 4,908   | 253      | 258,137        | 5,164   | 9        | <b>259,542*</b> | 5,018   | <1       | 0                 | <1                      |
| ca-GirQc                   | 4,158  | 3,179     | 10,243    | <b>174,782*</b> | 2,991   | 9        | 167,846     | 2,871   | 45       | 174,654        | 2,997   | 15       | <b>174,782*</b> | 2,994   | 11       | 282               | <1                      |
| vc-exact.038               | 786    | 10,321    | 3,703     | <b>12,015*</b>  | 208     | 589      | 10,406      | 168     | 1,994    | 12,014         | 208     | 12       | <b>12,015*</b>  | 207     | 4        | 697               | <1                      |
| vc-exact.078               | 11,349 | 4,289     | 13,450    | <b>438,671*</b> | 8,330   | <1       | 431,371     | 8,128   | 1,074    | 435,412        | 8,671   | <1       | <b>438,671*</b> | 8,330   | <1       | 0                 | <1                      |
| vc-exact.087               | 13,590 | 5,126     | 16,114    | <b>518,500*</b> | 10,025  | 2        | 509,734     | 9,809   | 2,319    | 517,500        | 10,083  | 2        | <b>518,500*</b> | 10,026  | <1       | 0                 | <1                      |
| vc-exact.107               | 6,402  | 15,646    | 5,594     | <b>407,878*</b> | 6,763   | <1       | 396,456     | 6,488   | 10,646   | 400,223        | 6,846   | 1        | <b>407,878*</b> | 6,763   | <1       | 0                 | <1                      |
| vc-exact.151               | 15,783 | 12,144    | 12,519    | <b>530,138*</b> | 9,526   | 2        | 516,445     | 9,135   | 2,402    | 522,462        | 9,764   | 1        | <b>530,138*</b> | 9,526   | <1       | 0                 | <1                      |
| vc-exact.167               | 15,783 | 18,235    | 6,428     | <b>465,178*</b> | 7,797   | 1        | 449,579     | 7,438   | 10,469   | 457,272        | 7,923   | 2        | <b>465,178*</b> | 7,797   | <1       | 0                 | <1                      |
| bio-dmela                  | 7,393  | 18,897    | 6,672     | <b>302,992*</b> | 4,952   | <1       | 280,897     | 4,474   | 170      | 302,449        | 4,959   | 10       | <b>302,992*</b> | 4,951   | <1       | 44                | <1                      |
| vc-exact.011               | 9,877  | 19,102    | 6,871     | <b>303,793*</b> | 5,369   | 1        | 286,137     | 4,950   | 4,818    | 301,789        | 5,487   | 7        | <b>303,793*</b> | 5,387   | <1       | 172               | <1                      |
| web-spam                   | 4,767  | 8,089     | 28,386    | <b>190,507*</b> | 3,285   | 4.61     | 180,446     | 3,130   | 53       | 190,344        | 3,299   | 14       | 190,459         | 3,289   | 13       | 487               | <1                      |
| vc-exact.026               | 6,140  | 27,159    | 9,608     | <b>201,509*</b> | 3,887   | 1        | 177,902     | 3,372   | 668      | 201,316        | 3,922   | 17       | 201,503         | 3,900   | <1       | 300               | <1                      |
| vc-exact.001               | 6,160  | 19,655    | 20,552    | <b>215,941*</b> | 4,129   | 2        | 194,984     | 3,709   | 9,575    | 215,668        | 4,175   | 13       | <b>215,941*</b> | 4,128   | <1       | 134               | <1                      |
| vc-exact.024               | 7,620  | 11,367    | 35,926    | <b>236,109</b>  | 4,632   | 10,783   | 226,540     | 4,438   | 244      | 235,440        | 4,735   | 14       | 236,018         | 4,659   | 12       | 1,255             | <1                      |
| C1000.9                    | 1,000  | 11,999    | 37,432    | 5,263           | 99      | 10,800   | 6,104       | 116     | 430      | 7,229          | 126     | 12       | <b>7,239</b>    | 125     | 10       | 1,000             | <1                      |
| tech-WHOIS                 | 7,476  | 42,181    | 14,762    | <b>325,584*</b> | 5,368   | 5        | 309,903     | 5,050   | 218      | 325,327        | 5,367   | 14       | 325,581         | 5,371   | 13       | 338               | <1                      |
| p-hat700-3                 | 700    | 30,398    | 31,242    | 4,025           | 68      | 10,800   | 3,030       | 52      | 7,436    | <b>4,473</b>   | 78      | <1       | <b>4,473</b>    | 78      | <1       | 700               | <1                      |
| vc-exact.008               | 7,537  | 35,678    | 37,155    | <b>247,091*</b> | 4,800   | 3        | 210,126     | 4,089   | 9,093    | 246,771        | 4,839   | 14       | <b>247,091*</b> | 4,810   | <1       | 574               | <1                      |
| keller5                    | 776    | 17,800    | 56,910    | 2,373           | 58      | 10,800   | 2,860       | 54      | 6,327    | <b>3,877</b>   | 69      | 1        | <b>3,877</b>    | 69      | 2        | 776               | <1                      |
| vc-exact.194               | 1,150  | 39,520    | 41,331    | 3,734           | 77      | 10,708   | 4,386       | 73      | 1,324    | <b>5,419</b>   | 86      | <1       | <b>5,419</b>    | 86      | <1       | 1,150             | <1                      |
| hamming10-4                | 1,024  | 66,369    | 23,231    | 3,256           | 52      | 8,108    | 3,073       | 45      | 2,069    | <b>3,660</b>   | 54      | <1       | <b>3,660</b>    | 54      | <1       | 1,024             | <1                      |
| brock800.2                 | 800    | 26,629    | 84,805    | 1,177           | 49      | 10,800   | 1,996       | 36      | 10       | <b>2,473</b>   | 44      | <1       | <b>2,473</b>    | 43      | <1       | 800               | <1                      |
| brock800.4                 | 800    | 26,831    | 85,126    | 1,583           | 48      | 10,800   | 1,979       | 39      | 7,215    | <b>2,501</b>   | 43      | <1       | <b>2,501</b>    | 42      | <1       | 800               | <1                      |
| ca-HepPh                   | 11,204 | 57,721    | 59,898    | <b>372,096</b>  | 6,094   | 10,800   | 348,738     | 5,571   | 422      | 370,779        | 6,083   | 6        | 372,079         | 6,098   | 17       | 2,165             | <1                      |
| p-hat700-2                 | 700    | 90,788    | 32,134    | 2,870           | 41      | 10,140   | 2,345       | 37      | 2,078    | <b>2,971</b>   | 42      | <1       | <b>2,971</b>    | 42      | <1       | 700               | <1                      |
| vc-exact.196               | 1,534  | 93,273    | 32,809    | 3,916           | 62      | 10,800   | 4,273       | 57      | 66       | <b>5,321</b>   | 76      | <1       | <b>5,321</b>    | 76      | <1       | 1,534             | <1                      |
| p-hat700-1                 | 700    | 135,804   | 47,847    | 730             | 11      | 10,800   | <b>844*</b> | 11      | 5        | <b>844*</b>    | 11      | <1       | <b>844*</b>     | 11      | <1       | 700               | <1                      |
| ca-AstroPh                 | 17,903 | 47,135    | 149,837   | <b>604,288</b>  | 10,468  | 10,800   | 558,736     | 9,752   | 2,544    | 602,320        | 10,521  | 2        | 604,019         | 10,491  | 14       | 4,985             | 1                       |
| C2000.9                    | 2,000  | 147,548   | 51,920    | 3,958           | 65      | 9,489    | 5,477       | 73      | 11       | <b>6,396</b>   | 86      | 3        | <b>6,396</b>    | 86      | 3        | 2,000             | <1                      |
| DSJC1000.5                 | 1,000  | 59,694    | 189,980   | 925             | 39      | 7,645    | 1,515       | 30      | 694      | <b>1,861</b>   | 32      | 1        | <b>1,861</b>    | 32      | <1       | 1,000             | <1                      |
| socfb-MIT                  | 6,402  | 123,064   | 128,166   | 7,098           | 124     | 10,800   | 110,677     | 1,779   | 20       | 129,807        | 2,142   | 17       | <b>129,917</b>  | 2,132   | 16       | 5,494             | <1                      |
| p-hat1500-3                | 1,500  | 66,206    | 210,800   | 4,097           | 132     | 10,800   | 3,877       | 83      | 704      | <b>7,501</b>   | 148     | 14       | <b>7,501</b>    | 148     | 16       | 1,500             | <1                      |
| socfb-UCSB37               | 14,917 | 356,918   | 125,297   | 16,708          | 287     | 10,800   | 219,965     | 3,286   | 256      | 254,965        | 4,013   | 16       | <b>255,924</b>  | 3,994   | 22       | 13,655            | 3                       |
| socfb-Duke14               | 9,885  | 374,731   | 131,706   | 11,565          | 198     | 10,800   | 125,940     | 1,887   | 39       | 151,169        | 2,415   | 15       | <b>151,365</b>  | 2,390   | 18       | 9,003             | 4                       |
| p-hat1500-2                | 1,500  | 411,372   | 143,918   | 3,542           | 53      | 10,800   | 2,611       | 43      | 2,150    | <b>4,253</b>   | 68      | <1       | <b>4,253</b>    | 68      | <1       | 1,500             | <1                      |
| socfb-Stanford3            | 11,586 | 136,823   | 431,486   | 7,250           | 122     | 10,800   | 215,381     | 3,932   | 265      | 251,350        | 4,441   | 12       | <b>251,932</b>  | 4,436   | 14       | 9,380             | 2                       |
| socfb-UConn                | 17,206 | 448,038   | 156,829   | 16,996          | 279     | 10,800   | 231,718     | 3,471   | 322      | 274,637        | 4,329   | 12       | <b>275,320</b>  | 4,299   | 18       | 16,025            | 5                       |
| p-hat1500-1                | 1,500  | 411,744   | 427,583   | 0               | 0       | 10,800   | 1,184       | 18      | 5,499    | <b>1,287</b>   | 19      | <1       | <b>1,287</b>    | 19      | 1        | 1,500             | <1                      |
| C2000.5                    | 2,000  | 489,894   | 509,270   | 0               | 0       | 10,800   | 1,581       | 24      | 865      | <b>1,849</b>   | 26      | 2        | <b>1,849</b>    | 26      | 6        | 2,000             | 1                       |
| keller6                    | 3,361  | 759,816   | 266,766   | 0               | 0       | 10,800   | 3,545       | 55      | 1,561    | <b>5,236</b>   | 73      | 10       | <b>5,236</b>    | 73      | 16       | 3,361             | <1                      |
| C4000.5                    | 4,000  | 1,957,884 | 2,039,848 | 0               | 0       | 10,800   | 1,611       | 25      | 1,659    | 1,948          | 28      | 20       | <b>1,952</b>    | 28      | 22       | 4,000             | 9                       |
| # of best / # of instances |        |           |           | 24/47           | —       | —        | 1/47        | —       | —        | 18/47          | —       | —        | 41/47           | —       | —        | —                 | —                       |
| average running time(s)    |        |           |           | —               | —       | 5,819.2  | —           | —       | 2,087.4  | —              | —       | 7.9      | —               | —       | 5.9      | —                 | 1.4                     |

Table 3 Comparative results of RLS on SET-3 instances

| Instance                   | V          | E <sub>p</sub> | E <sub>r</sub> | CPLEX               |                |          | LA-B&B        |                |          | ALS            |                |          | RLS                 |                |          |                  |                         |
|----------------------------|------------|----------------|----------------|---------------------|----------------|----------|---------------|----------------|----------|----------------|----------------|----------|---------------------|----------------|----------|------------------|-------------------------|
|                            |            |                |                | BKV                 | V <sub>f</sub> | htime(s) | BKV           | V <sub>f</sub> | htime(s) | BKV            | V <sub>f</sub> | htime(s) | BKV                 | V <sub>f</sub> | htime(s) | V <sub>set</sub> | time <sub>tot</sub> (s) |
| foodweb-wet                | 128        | 1,509          | 566            | <b>2,464*</b>       | 44             | <1       | <b>2,464*</b> | 44             | 8        | <b>2,464*</b>  | 44             | <1       | <b>2,464*</b>       | 44             | <1       | 125              | <1                      |
| foodweb-dry                | 128        | 1,571          | 535            | <b>2,226*</b>       | 42             | <1       | <b>2,226*</b> | 42             | 8        | <b>2,226*</b>  | 42             | <1       | <b>2,226*</b>       | 42             | <1       | 125              | <1                      |
| USAir97                    | 332        | 1,589          | 537            | <b>10,308*</b>      | 194            | <1       | 9,507         | 178            | 407      | <b>10,308*</b> | 194            | <1       | <b>10,308*</b>      | 194            | <1       | 0                | <1                      |
| powergrid                  | 4,941      | 1,727          | 4,867          | <b>193,339*</b>     | 3,710          | <1       | 190,537       | 3,684          | 108      | 193,095        | 3,754          | 59       | <b>193,339*</b>     | 3,537          | <1       | 0                | <1                      |
| CondMat                    | 23,133     | 46,769         | 46,670         | <b>711,517*</b>     | 12,821         | 12       | 685,442       | 12,061         | 5,749    | 705,901        | 13,064         | 14       | 711,334             | 12,870         | 45       | 1,648            | <1                      |
| Email                      | 265,009    | 91,093         | 273,388        | <b>13,054,427*</b>  | 257,435        | 118      | OOM           | —              | —        | OOM            | —              | —        | <b>13,054,427*</b>  | 257,394        | 1        | 0                | 1                       |
| Epinion                    | 75,879     | 202,653        | 203,087        | <b>3,052,059*</b>   | 57,976         | 60       | OOM           | —              | —        | 3,038,533      | 58,267         | 18       | <b>3,052,059*</b>   | 58,008         | 1        | 253              | 1                       |
| Dblp                       | 317,080    | 787,268        | 262,598        | <b>9,737,911*</b>   | 171,421        | 790      | OOM           | —              | —        | OOM            | —              | —        | 9,734,653           | 171,403        | 64       | 11,851           | 11                      |
| cnr-2000                   | 325,557    | 685,686        | 2,053,283      | 13,367,460          | 260,331        | 10,800   | OOM           | —              | —        | OOM            | —              | —        | <b>13,368,670</b>   | 260,716        | 482      | 59,052           | 399                     |
| WikiTalk                   | 2,394,385  | 3,494,873      | 1,164,692      | <b>118,708,326*</b> | 2,342,835      | 3,566    | OOM           | —              | —        | OOM            | —              | —        | <b>118,708,326*</b> | 2,342,861      | 333      | 8                | 333                     |
| BerkStan                   | 685,230    | 1,662,833      | 4,986,637      | <b>26,036,210</b>   | 501,197        | 10,800   | OOM           | —              | —        | OOM            | —              | —        | 26,031,704          | 501,410        | 1,112    | 114,191          | 1,031                   |
| As-Skitter                 | 1,696,415  | 5,550,661      | 5,544,637      | <b>66,603,360</b>   | 1,264,844      | 10,800   | OOM           | —              | —        | OOM            | —              | —        | 66,582,254          | 1,265,266      | 723      | 31,173           | 636                     |
| soc-pokec                  | 1,632,803  | 11,152,945     | 11,149,019     | 4,146,172           | 84,217         | 10,800   | OOM           | —              | —        | OOM            | —              | —        | <b>43,999,402</b>   | 833,989        | 934      | 881,319          | 134                     |
| Livcl                      | 4,846,609  | 10,710,579     | 32,140,658     | 0                   | 0              | 10,800   | OOM           | —              | —        | OOM            | —              | —        | <b>168,431,056</b>  | 3,258,831      | 904      | 401,307          | 469                     |
| uk2002                     | 18,483,186 | 65,451,024     | 196,336,234    | 0                   | 0              | 100,000  | OOM           | —              | —        | OOM            | —              | —        | <b>687,089,901</b>  | 13,716,043     | 7,678    | 4,806,660        | 6,243                   |
| # of best / # of instances |            |                |                | 11/15               | —              | —        | 3/15          | —              | —        | 3/15           | —              | —        | 11/15               | —              | —        | —                | —                       |
| average running time(s)    |            |                |                | —                   | —              | 10,570.1 | —             | —              | 1,256    | —              | —              | 15.7     | —                   | —              | 818.7    | —                | 617.5                   |

**Table 4** Comparative results of algorithms with or without reduction rules

| Instance                   | V          | $ V_{ker} $ | CPLEX               |          |                     |          | LA-B&B            |          |                     |         | RLS               |             |                     |          |
|----------------------------|------------|-------------|---------------------|----------|---------------------|----------|-------------------|----------|---------------------|---------|-------------------|-------------|---------------------|----------|
|                            |            |             | without reduction   |          | with reduction      |          | without reduction |          | with reduction      |         | without reduction |             | with reduction      |          |
|                            |            |             | BKV                 | htime(s) | BKV                 | htime(s) | BKV               | htime(s) | BKV                 | htimes  | BKV               | htime(s)    | BKV                 | htime(s) |
| bio-yeast                  | 1,458      | 0           | <b>68,574*</b>      | <1       | <b>68,574*</b>      | <1       | 66,545            | 2        | <b>68,574*</b>      | <1      | <b>68,574*</b>    | 1           | <b>68,574*</b>      | <1       |
| soc-wiki-Vote              | 889        | 0           | <b>37,358*</b>      | <1       | <b>37,358*</b>      | <1       | 35,973            | <1       | <b>37,358*</b>      | <1      | <b>37,358*</b>    | 1           | <b>37,358*</b>      | <1       |
| vc-exact.131               | 2,980      | 0           | <b>109,641*</b>     | <1       | <b>109,641*</b>     | <1       | 107,812           | 14       | <b>109,641*</b>     | <1      | 109,567           | 9           | <b>109,641*</b>     | <1       |
| web-edu                    | 3,031      | 98          | <b>114,140*</b>     | <1       | <b>114,140*</b>     | <1       | 109,856           | 10       | <b>114,140*</b>     | 21      | 114,080           | 12          | <b>114,140*</b>     | <1       |
| MANN_a81                   | 3,321      | 0           | <b>117,327*</b>     | <1       | <b>117,327*</b>     | <1       | 114,616           | 16       | <b>117,327*</b>     | <1      | 117,275           | 14          | <b>117,327*</b>     | <1       |
| tech-routers-rf            | 2,113      | 0           | <b>97,799*</b>      | <1       | <b>97,799*</b>      | <1       | 93,690            | 54       | <b>97,799*</b>      | <1      | <b>97,799*</b>    | 1           | <b>97,799*</b>      | <1       |
| vc-exact.039               | 6,795      | 0           | <b>259,542*</b>     | <1       | <b>259,542*</b>     | <1       | 254,941           | 253      | <b>259,542*</b>     | <1      | 259,475           | 13          | <b>259,542*</b>     | <1       |
| ca-GrQc                    | 4,158      | 282         | <b>174,782*</b>     | 9        | <b>174,782*</b>     | 6        | 167,846           | 45       | 174,525             | 2,998   | 174,768           | 7           | <b>174,782*</b>     | 11       |
| vc-exact.038               | 786        | 697         | <b>12,015*</b>      | 589      | <b>12,015*</b>      | 585      | 10,406            | 1,994    | 10,782              | 28      | <b>12,015*</b>    | 13          | <b>12,015*</b>      | 4        |
| vc-exact.078               | 11,349     | 0           | <b>438,671*</b>     | <1       | <b>438,671*</b>     | 1        | 431,371           | 1,074    | <b>438,671*</b>     | 1       | 438,306           | 16          | <b>438,671*</b>     | <1       |
| vc-exact.087               | 13,590     | 0           | <b>518,500*</b>     | 2        | <b>518,500*</b>     | <1       | 509,734           | 2,319    | <b>518,500*</b>     | <1      | 518,069           | 15          | <b>518,500*</b>     | <1       |
| vc-exact.107               | 6,402      | 0           | <b>407,878*</b>     | <1       | <b>407,878*</b>     | <1       | 396,456           | 10,646   | <b>407,878*</b>     | <1      | 406,379           | 14          | <b>407,878*</b>     | <1       |
| vc-exact.151               | 15,783     | 0           | <b>530,138*</b>     | 2        | <b>530,138*</b>     | <1       | 516,445           | 2,402    | <b>530,138*</b>     | <1      | 529,003           | 18          | <b>530,138*</b>     | <1       |
| vc-exact.167               | 15,783     | 0           | <b>465,178*</b>     | 1        | <b>465,178*</b>     | <1       | 449,579           | 10,469   | <b>465,178*</b>     | <1      | 463,446           | 12          | <b>465,178*</b>     | <1       |
| bio-dmela                  | 7,393      | 44          | <b>302,992*</b>     | <1       | <b>302,992*</b>     | <1       | 280,897           | 170      | <b>302,992*</b>     | <1      | 302,793           | 18          | <b>302,992*</b>     | <1       |
| vc-exact.011               | 9,877      | 172         | <b>303,793*</b>     | 1        | <b>303,793*</b>     | <1       | 286,137           | 4,818    | 303,589             | 1271    | 303,352           | 9           | <b>303,793*</b>     | <1       |
| web-spam                   | 4,767      | 487         | <b>190,507*</b>     | 4.61     | <b>190,507*</b>     | <1       | 180,446           | 53       | 189,897             | <1      | 190,460           | 18          | 190,460             | 13       |
| vc-exact.026               | 6,140      | 300         | <b>201,509*</b>     | 1        | <b>201,509*</b>     | <1       | 177,902           | 668      | 200,868             | <1      | 201,458           | 13          | 201,503             | <1       |
| vc-exact.001               | 6,160      | 134         | <b>215,941*</b>     | 2        | <b>215,941*</b>     | <1       | 194,984           | 9,575    | <b>215,941*</b>     | 2       | 215,934           | 13          | <b>215,941*</b>     | <1       |
| vc-exact.024               | 7,620      | 1,255       | <b>236,109</b>      | 10,783   | <b>236,109</b>      | 10,800   | 226,540           | 244      | 234,933             | 1       | 235,911           | 14          | 236,018             | 12       |
| C1000.9                    | 1,000      | 1,000       | 5,263               | 10,800   | 5,263               | 10,800   | 6,104             | 430      | 6,104               | 430     | 7,235             | 16          | <b>7,237</b>        | 10       |
| tech-WHOIS                 | 7,476      | 338         | <b>325,584*</b>     | 5        | <b>325,584*</b>     | <1       | 309,903           | 218      | 325,119             | 255     | 325,480           | 16          | 325,581             | 13       |
| p-hat700-3                 | 700        | 700         | 4,025               | 10,800   | 4,025               | 10,800   | 3,030             | 7,436    | 3,030               | 7,436   | <b>4,473</b>      | 1           | <b>4,473</b>        | <1       |
| vc-exact.008               | 7,537      | 574         | <b>247,091*</b>     | 3        | <b>247,091*</b>     | <1       | 210,126           | 9,093    | 245,289             | 6,627   | 247,036           | 16          | <b>247,091*</b>     | <1       |
| keller5                    | 776        | 776         | 2,373               | 10,800   | 2,373               | 10,800   | 2,860             | 6,327    | 2,860               | 6,327   | <b>3,877</b>      | 2           | <b>3,877</b>        | 2        |
| vc-exact.194               | 1,150      | 1,150       | 3,734               | 10,708   | 3,734               | 10,800   | 4,386             | 1,324    | 4,386               | 1,324   | <b>5,419</b>      | 2           | <b>5,419</b>        | <1       |
| hamming10-4                | 1,024      | 1,024       | 3,256               | 8,108    | 3,256               | 10,800   | 3,073             | 2,069    | 3,073               | 2,069   | <b>3,660</b>      | 1           | <b>3,660</b>        | <1       |
| brock800.2                 | 800        | 800         | 1,177               | 10,800   | 1,177               | 10,800   | 1,996             | 10       | 1,996               | 10      | <b>2,473</b>      | 1           | <b>2,473</b>        | <1       |
| brock800.4                 | 800        | 800         | 1,583               | 10,800   | 1,583               | 10,800   | 1,979             | 7,215    | 1,979               | 7,215   | <b>2,501</b>      | 1           | <b>2,501</b>        | <1       |
| ca-HepPh                   | 11,204     | 2,165       | 372,096             | 10,800   | <b>372,229</b>      | 10,800   | 348,738           | 422      | 368,637             | 2       | 372,079           | 14          | 372,079             | 17       |
| p-hat700-2                 | 700        | 700         | 2,870               | 10,140   | 2,870               | 10,140   | 2,345             | 2,078    | 2,345               | 2,078   | <b>2,971</b>      | 1           | <b>2,971</b>        | <1       |
| vc-exact.196               | 1,534      | 1,534       | 3,916               | 10,800   | 3,916               | 10,800   | 4,273             | 66       | 4,273               | 66      | <b>5,321</b>      | 2           | <b>5,321</b>        | <1       |
| p-hat700-1                 | 700        | 700         | 730                 | 10,800   | 730                 | 10,800   | <b>844*</b>       | 5        | <b>844*</b>         | 5       | <b>844*</b>       | 1           | <b>844*</b>         | <1       |
| ca-AstroPh                 | 17,903     | 4,985       | 604,288             | 10,800   | <b>604,342</b>      | 10,800   | 558,736           | 2,544    | 593,899             | 37      | 603,732           | 15          | 603,945             | 14       |
| C2000.9                    | 2,000      | 2,000       | 3,958               | 9,489    | 3,958               | 10,800   | 5,477             | 11       | 5,477               | 11      | <b>6,396</b>      | 3           | <b>6,396</b>        | 3        |
| DSJC1000.5                 | 1,000      | 1,000       | 925                 | 7,645    | 925                 | 10,800   | 1,515             | 694      | 1,515               | 694     | <b>1,861</b>      | 1           | <b>1,861</b>        | <1       |
| socfb-MIT                  | 6,402      | 5,494       | 7,098               | 10,800   | 118,114             | 10,800   | 110,677           | 20       | 113,623             | 10      | 129,831           | 16          | <b>129,872</b>      | 16       |
| p-hat1500-3                | 1,500      | 1,500       | 4,097               | 10,800   | 4,097               | 10,800   | 3,877             | 704      | 3,877               | 704     | 7,500             | 15          | <b>7,501</b>        | 16       |
| socfb-UCSB37               | 14,917     | 13,655      | 16,708              | 10,800   | 57,084              | 10,800   | 219,965           | 256      | 223,780             | 150     | 255,887           | 21          | <b>255,898</b>      | 22       |
| socfb-Duke14               | 9,885      | 9,003       | 11,565              | 10,800   | 127,145             | 10,800   | 125,940           | 39       | 127,269             | 2,231   | 151,321           | 14          | <b>151,326</b>      | 18       |
| p-hat1500-2                | 1,500      | 1,500       | 3,542               | 10,800   | 3,542               | 10,800   | 2,611             | 2,150    | 2,611               | 2,150   | <b>4,253</b>      | 1           | <b>4,253</b>        | <1       |
| socfb-Stanford3            | 11,586     | 9,380       | 7,250               | 10,800   | 127,708             | 10,800   | 215,381           | 265      | 223,398             | 7,756   | 251,788           | 19          | <b>251,833</b>      | 14       |
| socfb-UConn                | 17,206     | 16,025      | 16,996              | 10,800   | 51,328              | 10,800   | 231,718           | 322      | 235,104             | 240     | 275,006           | 16          | <b>275,034</b>      | 20       |
| p-hat1500-1                | 1,500      | 1,500       | 0                   | 10,800   | 0                   | 10,800   | 1,184             | 5,499    | 1,184               | 5,499   | <b>1,287</b>      | 2           | <b>1,287</b>        | 1        |
| C2000.5                    | 2,000      | 2,000       | 0                   | 10,800   | 0                   | 10,800   | 1,581             | 865      | 1,581               | 865     | <b>1,849</b>      | 5           | <b>1,849</b>        | 6        |
| keller6                    | 3,361      | 3,361       | 0                   | 10,800   | 0                   | 10,800   | 3,545             | 1,561    | 3,545               | 1,561   | 5,229             | 19          | <b>5,236</b>        | 16       |
| C4000.5                    | 4,000      | 4,000       | 0                   | 10,800   | 0                   | 10,800   | 1,611             | 1,659    | 1,611               | 1,659   | <b>1,951</b>      | 15          | <b>1,951</b>        | 22       |
| foodweb-wet                | 128        | 125         | <b>2,464*</b>       | <1       | <b>2,464*</b>       | <1       | <b>2,464*</b>     | 8        | <b>2,464*</b>       | 6       | <b>2,464*</b>     | <1          | <b>2,464*</b>       | <1       |
| foodweb-dry                | 128        | 125         | <b>2,226*</b>       | <1       | <b>2,226*</b>       | <1       | <b>2,226*</b>     | 8        | <b>2,226*</b>       | 8       | <b>2,226*</b>     | <1          | <b>2,226*</b>       | <1       |
| USAir97                    | 332        | 0           | <b>10,308*</b>      | <1       | <b>10,308*</b>      | <1       | 9,507             | 407      | <b>10,308*</b>      | <1      | <b>10,308*</b>    | <1          | <b>10,308*</b>      | <1       |
| powergrid                  | 4,941      | 0           | <b>193,339*</b>     | <1       | <b>193,339*</b>     | <1       | 190,537           | 108      | <b>193,339*</b>     | <1      | 193,194           | 52          | <b>193,339*</b>     | <1       |
| CondMat                    | 23,133     | 1,648       | <b>711,517*</b>     | 12       | <b>711,517*</b>     | <1       | 685,442           | 5,749    | 708,907             | 84      | 709,927           | 54          | 711,334             | 45       |
| Email                      | 265,009    | 0           | <b>13,054,427*</b>  | 118      | <b>13,054,427*</b>  | 1        | OOM               | –        | <b>13,054,427*</b>  | 1       | 13,054,390        | 69          | <b>13,054,427*</b>  | 1        |
| Epinion                    | 75,879     | 253         | <b>3,052,059*</b>   | 60       | <b>3,052,059*</b>   | 1        | OOM               | –        | 3,051,256           | 196     | 3,050,415         | 67          | <b>3,052,059*</b>   | 1        |
| Dblp                       | 317,080    | 11,851      | <b>9,737,911*</b>   | 790      | <b>9,737,911*</b>   | 39       | OOM               | –        | 9,715,860           | 307     | 9,577,609         | 46          | 9,734,653           | 64       |
| cnr-2000                   | 325,557    | 59,052      | 13,367,460          | 10,800   | <b>13,641,278</b>   | 10,800   | OOM               | –        | 11,347,241          | 10,796  | 13,361,167        | 84          | 13,368,670          | 482      |
| WikiTalk                   | 2,394,385  | 8           | <b>118,708,326*</b> | 3,566    | <b>118,708,326*</b> | 333      | OOM               | –        | <b>118,708,326*</b> | 333     | 118,672,055       | 56          | <b>118,708,326*</b> | 333      |
| BerkStan                   | 685,230    | 114,191     | 26,036,210          | 10,800   | <b>26,055,767</b>   | 10,800   | OOM               | –        | 22,591,394          | 1,031   | 25,813,846        | 200         | 26,031,704          | 1,112    |
| As-Skitter                 | 1,696,415  | 31,173      | 66,603,360          | 10,800   | <b>66,830,857</b>   | 10,800   | OOM               | –        | 65,907,243          | 10,512  | 59,886,304        | 200         | 66,582,254          | 723      |
| soc-pokec                  | 1,632,803  | 881,319     | 4,146,172           | 10,800   | 27,037,851          | 10,800   | OOM               | –        | OOM                 | –       | 36,540,838        | 350         | <b>43,999,402</b>   | 934      |
| LiveJ                      | 4,846,609  | 401,307     | 0                   | 10,800   | 163,061,840         | 10,800   | OOM               | –        | OOM                 | –       | 148,758,359       | 318         | <b>168,431,056</b>  | 904      |
| uk2002                     | 18,483,186 | 4,806,660   | 0                   | 100,000  | 567,666,923         | 100,000  | OOM               | –        | OOM                 | –       | 633,365,020       | 1,806       | <b>687,089,901</b>  | 7,678    |
| # of best / # of instances |            |             | 31/62               | –        | 36/62               | –        | 3/62              | –        | 21/62               | –       | 22/62             | –           | 51/62               | –        |
| average running time(s)    |            |             | –                   | 7,096.5  | –                   | 6,901.0  | –                 | 2,007.5  | –                   | 1,441.1 | –                 | <b>60.8</b> | –                   | 202.6    |
