# Supplementary material
Source: Atypon-hosted journal article supplement (doi:10.1287/ijoc.2025.1203)
Supplement: ijoc.2025.1203.sm1.pdf [file ijoc.2025.1203.sm1.pdf]

# Online Supplement for “A Reduction-Driven Local Search for the Generalized Independent Set Problem”

## 1. Technical Proofs

*Proof of R1.* Consider whether  $u$  and  $v$  are included in a generalized independent set  $S$ . There are four cases:  $u \in S$  and  $v \in S$ ,  $u \in S$  and  $v \notin S$ ,  $u \notin S$  and  $v \in S$ , and  $u \notin S$  and  $v \notin S$ . When either  $u \notin S$  or  $v \notin S$ , the edge  $e = \{u, v\}$  does not exist in  $G[S]$ , and thus removing  $e$  has no effect on the net benefit  $nb(S)$ . If both  $u \in S$  and  $v \in S$ , the edge  $\{u, v\}$  has a zero penalty, which has no effect on the net benefit  $nb(S)$  either.  $\square$

*Proof of R2.* Assume, for the sake of contradiction, that there exists  $I \in MGIS(G)$  such that  $u \in I$  and  $v \in I$ . Assume, without loss of generality, that  $\tilde{w}(u) \leq \tilde{w}(v)$ . We have  $nb(I) - nb(I \setminus \{u\}) = w(u) - \sum_{x \in N_r(u) \cap I} p(\{u, x\}) \leq w(u) - p(\{u, v\}) + \sum_{x \in N_r(u)} \max(0, -p(\{u, x\})) = \tilde{w}(u) - p(\{u, v\}) < 0$ . In conclusion,  $I \setminus \{u\}$  has a larger net benefit without containing permanent edges, which contradicts the optimality of  $I$ . Therefore,  $u$  and  $v$  cannot be simultaneously included in any  $S \in MGIS(G)$ , which is equivalent to the case where  $\{u, v\} \in E_p$ .  $\square$

*Proof of R3.* We prove that  $u$  is in at least one set in  $MGIS(G)$ . Assume, for the sake of contradiction, that  $u$  is not included in any set in  $MGIS(G)$ . Let  $I$  be an arbitrary set in  $MGIS(G)$ . It is clear that at least one vertex in  $N(u)$  must be included in  $I$ . Otherwise,  $I \cup \{u\}$  implies with a larger net benefit without including any permanent edge, a contradiction, since  $w(u) \geq w^+(N(u))$ ,  $nb(I \cup \{u\} \setminus N(u)) \geq nb(I)$ . So  $u$  is in at least one set in  $MGIS(G)$ . It holds that  $\alpha(G) = \alpha(G') + w(u)$ .  $\square$

*Proof of R4.* We prove that  $u$  is in at least one set in  $MGIS(G)$ . Assume, for the sake of contradiction, that  $u$  is not included in any set in  $MGIS(G)$ . Let  $I$  be an arbitrary set in  $MGIS(G)$ . Let  $S := N_p(u) \cap I$  and  $S' := N_r(u) \cap I$ . Now, we remove  $S$  from  $I$  and add  $u$  to  $I$  to obtain  $I'$ . Consider the difference between two net benefits  $nb(I') - nb(I) \geq w(u) - \sum_{v \in S} \tilde{w}(v) - \sum_{v \in S'} p(\{u, v\}) \geq 0$ . Moreover,  $G[I']$  does not contain permanent edges. Therefore,  $I' \in MGIS(G)$ , which contradicts the assumption. So  $u$  is in at least one set in  $MGIS(G)$ . It holds that  $\alpha(G) = \alpha(G') + w(u)$ .  $\square$

*Proof of R5.* We prove that  $u$  is not in any set in  $MGIS(G)$ . Given an arbitrary  $I \in MGIS(G)$ , there are two cases. When none of the neighbors of  $u$  is included in  $I$ ,  $I$  does not include  $u$  because  $w(u) < 0$ . When any subset of neighbors of  $u$  is included in  $I$ ,  $I$  does not include  $u$  either because  $w(u) - \sum_{v \in S} p(\{u, v\}) < 0$  for any subset  $S \subseteq N(u)$ . Since  $I$  is an arbitrary set in  $MGIS(G)$ ,  $u$  will not appear in any  $I \in MGIS(G)$  and we can directly remove  $u$  from  $G$ .  $\square$

*Proof of R6.* Observe that there exists a vertex set  $I \in MGIS(G)$  such that  $I \cap N_p[u] \neq \emptyset$ , because if  $I \cap N_p[u] = \emptyset$  then  $nb(I \cup \{u\}) = nb(I) + w(u) \geq nb(I)$  implies  $I \cup \{u\} \in MGIS(G)$ .

Whenever a vertex  $x$  in  $N_p(u)$  is included in  $I$ , other vertices in the clique  $N_p[u] \setminus \{x\}$  must not be included in  $I$ . Then  $I \cup \{u\} \setminus \{x\} \in MGIS(G)$  because  $G[I \cup \{u\} \setminus \{x\}]$  does not contain permanent edges, and  $nb(I \cup \{u\} \setminus \{x\}) \geq nb(I) + w(u) - w(x) + \sum_{v \in N_r(x)} p(\{v, x\}) - \sum_{v \in N_r(u)} \max(0, p(\{u, v\})) \geq nb(I) + w(u) - \sum_{v \in N_r(u)} \max(0, p(\{u, v\})) - \max(0, \tilde{w}(x)) \geq nb(I)$ . In conclusion,  $u$  is in at least one set in  $MGIS(G)$ .  $\square$

*Proof of R7.* Given an arbitrary  $I \in MGIS(G)$ .

When  $w(u) \geq p(\{u, v\})$  and  $w(u) \geq 0$ . If  $u \notin I$  and  $v \in I$ , then  $I \cup \{u\} \in MGIS(G)$  because  $nb(I \cup \{u\}) = nb(I) + w(u) - p(\{u, v\}) \geq nb(I)$ . If  $u \notin I$  and  $v \notin I$ , then  $I \cup \{u\} \in MGIS(G)$  because  $G[I \cup \{u\}]$  does not contain permanent edges, and  $nb(I \cup \{u\}) = nb(I) + w(u) \geq nb(I)$ . In summary,  $u$  is included in at least one set in  $MGIS(G)$ .

When  $w(u) < 0$  and  $w(u) \geq p(\{u, v\})$ . If  $v \in I$ , then  $I \cup \{u\} \in MGIS(G)$  because  $nb(I \cup \{u\}) = nb(I) + w(u) - p(\{u, v\}) \geq nb(I)$  for  $u \notin I$ , and  $G[I \cup \{u\}]$  does not contain permanent edges. If  $v \notin I$ , then  $nb(I \cup \{u\}) < nb(I \setminus \{u\})$ . In other words, there exists a set  $S \in MGIS(G)$  such that  $u \in S$  if and only if there exists a set  $S' \in MGIS(G')$  such that  $v \in S'$ . It is easy to verify  $\alpha(G') = \alpha(G)$  in all combinations of  $u, v$  that could appear in a set in  $MGIS(G)$ .

When  $w(u) \geq 0$ ,  $w(u) < p(\{u, v\})$  and  $w(u) \geq \tilde{w}(v)$ . If  $u \notin I, v \in I$ , then  $nb(I \cup \{u\}) \setminus \{v\} - nb(I) = w(u) - w(v) - \sum_{x \in N_r(v) \cap I} \max(0, -p(\{v, x\})) = w(u) - \tilde{w}(v) \geq 0$ , implying  $I \cup \{u\} \setminus \{v\} \in MGIS(G)$ . Otherwise, if  $u \notin I, v \notin I$ , then  $nb(I \cup \{u\}) - nb(I) = w(u) \geq 0$ , thus  $I \cup \{u\} \in MGIS(G)$ . In summary,  $u$  is included in at least one vertex set  $I' \in MGIS(G)$  and  $v$  is not in  $I'$ .

When  $w(u) \geq 0$ ,  $w(u) < p(\{u, v\})$  and  $w(u) < \tilde{w}(v)$ .  $u$  and  $v$  cannot be both included in  $I$ . Indeed, if  $u, v \in I$ , then  $nb(I \setminus \{u\}) = nb(I) + p(\{u, v\}) - w(u) > nb(I)$ . Moreover,  $G[I \setminus \{u\}]$  does not contain permanent edges. This contradicts the optimality of  $I$ . Furthermore, if  $v \notin I$ , then  $I \cup \{u\} \in MGIS(G)$  because  $nb(I \cup \{u\}) - nb(I \setminus \{u\}) = w(u) \geq 0$ . We conclude that there exists a vertex set in  $MGIS(G)$  that includes  $u$  iff there exists a vertex set in  $MGIS(G')$  that does not contain  $v$ . It is easy to verify  $\alpha(G') = \alpha(G)$  in all combinations of  $u, v$  that could appear in a set in  $MGIS(G)$ .

Finally, when  $w(u) < 0$  and  $w(u) < p(\{u, v\})$ . We have  $nb(I \cup \{u\}) < nb(I \setminus \{u\})$ , therefore  $u$  is not in any set in  $MGIS(G)$  and we can directly remove  $u$ .  $\square$

*Proof of R8.* Given an arbitrary  $I \in MGIS(G)$ . Because that  $\{x, y\} \in E_p$ , it holds that  $x$  and  $y$  cannot be both included in  $I$ .

Case 1:  $w(u) \geq \max(p(\{u, x\}), p(\{u, y\}))$ .

When  $w(u) \geq 0$ . If both  $x$  and  $y$  are not included in  $I$  and  $u \notin I$ , then  $nb(I \cup \{u\}) = nb(I) + w(u) \geq nb(I)$ . If  $u \notin I$  and either  $x \in I$  or  $y \in I$ ,  $nb(I \cup \{u\}) \geq nb(I) + w(u) - \max(p(\{u, x\}), p(\{u, y\})) \geq nb(I)$ . In summary, there exists a vertex set in  $MGIS(G)$  that includes  $u$ .

When  $w(u) < 0$ . If both  $x$  and  $y$  are not included in  $I$ , then  $u \notin I$  because  $nb(I \cup \{u\}) = nb(I \setminus \{u\}) + w(u) < nb(I \setminus \{u\})$ . If either  $x \in I$  or  $y \in I$  and  $u \notin I$ , then  $I \cup \{u\} \in MGIS(G)$  because  $nb(I \cup \{u\}) \geq nb(I) + w(u) - \max(p(\{u, x\}), p(\{u, y\})) \geq nb(I)$ . We conclude that there exists a vertex set in  $MGIS(G)$  that includes  $u$  iff there exists a vertex set in  $MGIS(G')$  that includes either  $x$  or  $y$ . In other words, we can defer the decision of  $u$  after determining  $x$  and  $y$ . It is easy to verify  $\alpha(G') = \alpha(G)$  in all combinations of  $u, x, y$  that could appear in a set in  $MGIS(G)$ .

Case 2:  $p(\{u, y\}) \leq w(u) < p(\{u, x\})$ . In this case, if  $y$  is in  $I$ , then  $x \notin I$  and  $I \cup \{u\} \in MGIS(G)$ .

When  $w(u) \geq 0$  and  $w(u) \geq \tilde{w}(x)$ . If  $x$  is in  $I$ , then  $y, u$  are not in  $I$  and  $I \cup \{u\} \setminus \{x\} \in MGIS(G)$  because  $nb(I \cup \{u\} \setminus \{x\}) \geq nb(I) + w(u) - \tilde{w}(x) \geq nb(I)$ . If neither  $x$  nor  $y$  is included in  $I$ , then  $I \cup \{u\} \in MGIS(G)$  because  $nb(I \cup \{u\}) = nb(I) + w(u) \geq nb(I)$  for  $u \notin I$ . In summary, there exists a vertex set  $I' \in MGIS(G)$  that includes  $u$  and not includes  $x$ .

When  $w(u) \geq 0$  and  $w(u) < \tilde{w}(x)$ . There are five cases:  $x \in I$  and  $u, y \notin I$ ,  $y \in I$  and  $u, x \notin I$ ,  $u \in I$  and  $x, y \notin I$ ,  $u, y \in I$  and  $x \notin I$ , and  $u, x \in I$  and  $y \notin I$ . But  $u, x$  cannot appear in the same  $I$ , otherwise  $nb(I \setminus \{u\}) = nb(I) + p(\{u, x\}) - w(u) > 0$  without containing permanent edges, which contradicts the optimality of  $I$ . If  $y \in I$  and  $u, x \notin I$ , then  $I \cup \{u\} \in MGIS(G)$ . In summary, there exists a vertex set  $I' \in MGIS(G)$  such that either  $x \in I'$ , or both  $u, y \in I'$ , or  $u \in I'$ . Since  $u$  only connects to  $x$  and  $y$  in  $G$ , we conclude that there exists a vertex set  $S \in MGIS(G)$  that includes  $u$  iff there exists a vertex set  $S' \in MGIS(G')$  that does not include  $x$ . In other words, we can defer  $u$  after the decision of  $x$ . It is easy to verify  $\alpha(G') = \alpha(G)$  in all combinations of  $u, x, y$  that could appear in a set in  $MGIS(G)$ .

When  $w(u) < 0$ . If  $y \notin I$ , then  $u \notin I$  because otherwise  $nb(I \setminus \{u\}) > nb(I)$ . Since  $u$  only connects to  $x$  and  $y$  in  $G$ , we conclude that there exists a vertex set  $S \in MGIS(G)$  that includes  $u$  iff there exists a vertex set  $S' \in MGIS(G')$  that includes  $y$ . In other words, we can defer  $u$  after the decision of  $y$ . It is easy to verify  $\alpha(G') = \alpha(G)$  in all combinations of  $u, x, y$  that could appear in a set in  $MGIS(G)$ .

Case 3:  $w(u) < p(\{u, x\})$  and  $w(u) < p(\{u, y\})$ . When  $w(u) \geq 0$ , the three vertices form a triangle where every edge has penalty  $M$ . The result follows from theorem 3.3 of Gu et al. (2021). In particular, (1) if  $w(u) \geq 0$  and  $w(u) \geq \tilde{w}(x)$ , then  $u$  must be in at least one set in  $MGIS(G)$ . (2)

If  $w(u) \geq 0$  and  $\tilde{w}(y) \leq w(u) < \tilde{w}(x)$ , then  $y$  must not be in at least one set in  $MGIS(G)$ . There exists a vertex set  $S \in MGIS(G)$  that includes  $u$  iff there exists a vertex set  $S' \in MGIS(G')$  that does not include  $x$ . (3) If  $w(u) \geq 0$  and  $w(u) < \tilde{w}(y)$ , then there exists a vertex set  $S \in MGIS(G)$  that includes  $u$  iff there exists a vertex set  $S' \in MGIS(G')$  that does not include both  $x$  and  $y$ . (4) When  $w(u) < 0$ , the result follows from R5. It is easy to verify  $\alpha(G') = \alpha(G)$  in all conditions and all combinations of  $u, x, y$  that could appear in a set in  $MGIS(G)$ .  $\square$

*Proof of R9.* Given an arbitrary  $I \in MGIS(G)$ . Notice that  $x$  and  $y$  can be both included in  $I$ .

Case 1:  $w(u) \geq p(\{u, x\})$ . In this case, if one of  $x, y$  is in  $I$ , say  $x$ , then  $I \cup \{u\} \in MGIS(G)$  because  $nb(I \cup \{u\}) - nb(I) \geq w(u) - p(\{u, x\}) \geq 0$  when  $u \notin I$ .

When  $w(u) \geq 0$  and  $w(u) \geq p(\{u, x\}) + p(\{u, y\})$ . If either  $x \in I$  or  $y \in I$ , then  $I \cup \{u\} \in MGIS(G)$  because  $nb(I \cup \{u\}) - nb(I) \geq w(u) - \max(p(\{u, x\}) + p(\{u, y\}), p(\{u, x\})) \geq 0$  for  $u \notin I$ . If none of  $x, y$  is in  $I$ , then  $I \cup \{u\} \in MGIS(G)$  because  $w(u) \geq 0$ . Therefore,  $u$  must belong to at least one set in  $MGIS(G)$ .

When  $w(u) \geq 0$  and  $w(u) < p(\{u, x\}) + p(\{u, y\})$ . If both  $x, y$  are in  $I$ , then  $nb(I \cup \{u\}) < nb(I)$ . If either  $x \notin I$  or  $y \notin I$ , then  $nb(I \cup \{u\}) \geq nb(I)$ . In other words, including  $u$  has negative profit only if both  $x$  and  $y$  are included in the same set in  $MGIS(G)$ . we conclude that there exists a vertex set  $S \in MGIS(G)$  that includes  $u$  iff there exists a vertex set  $S' \in MGIS(G')$  such that either  $x \notin S'$  or  $y \notin S'$ . It is easy to verify  $\alpha(G') = \alpha(G)$  in all combinations of  $u, x, y$  that could appear in a set in  $MGIS(G)$ .

When  $w(u) < 0$ , it holds that  $w(u) \geq p(\{u, x\}) + p(\{u, y\})$  because  $w(u) \geq p(\{u, x\})$  and  $p(\{u, y\}) < 0$ . If either  $x \in I$  or  $y \in I$ , then  $nb(I \cup \{u\}) \geq nb(I)$ . If both  $x \notin I$  and  $y \notin I$ , then  $nb(I \cup \{u\}) < nb(I)$ . In other words, including  $u$  has positive profit if and only if either  $x$  or  $y$  is included. we conclude that there exists a vertex set  $S \in MGIS(G)$  that includes  $u$  iff there exists a vertex set  $S' \in MGIS(G')$  such that either  $x \in S'$  or  $y \in S'$ . It is easy to verify  $\alpha(G') = \alpha(G)$  in all combinations of  $u, x, y$  that could appear in a set in  $MGIS(G)$ .

Case 2:  $p(\{u, y\}) \leq w(u) < p(\{u, x\})$ . In this case, we consider whether the three vertices  $u, x, y$  can be included in  $I$ .

When  $w(u) \geq 0$  and  $w(u) \geq p(\{u, x\}) + p(\{u, y\})$ , the all three vertices may be included in  $I$ . All combinations of  $x, y, u$  may appear in  $I$ . Except that if  $x$  is included and  $y$  is not included in  $I$ , then  $u \notin I$  because  $nb(I \cup \{u\}) = nb(I \setminus \{u\}) + w(u) - p(\{u, x\}) < nb(I \setminus \{u\})$ . In other words, there exists a vertex set  $S \in MGIS(G)$  that includes  $u$  iff there exists a vertex set  $S' \in MGIS(G')$

such that either  $x \notin S'$  or  $y \in S'$ . It is easy to verify  $\alpha(G') + w(u) = \alpha(G)$  in all combinations of  $x, y, u$  that could appear in a set in  $MGIS(G)$ .

When  $w(u) \geq 0$  and  $w(u) < p(\{u, x\}) + p(\{u, y\})$ , the three vertices can not be included in  $I$ . Moreover,  $u$  and  $x$  cannot be both included by  $I$  because otherwise  $nb(I \setminus u) > nb(I)$  without containing permanent edges, which contradicts the optimality of  $I$ . If  $x \notin I$ , then  $I \cup \{u\} \in MGIS(G)$  because  $nb(I \cup \{u\}) \geq nb(I \setminus \{u\})$ . In other words, there exists a vertex set  $S \in MGIS(G)$  that includes  $u$  iff there exists a vertex set  $S' \in MGIS(G')$  such that  $x \notin S'$ . It is easy to verify  $\alpha(G') + w(u) = \alpha(G)$  in all combinations of  $x, y, u$  that could appear in a set in  $MGIS(G)$ .

When  $w(u) < 0$  and  $w(u) \geq p(\{u, x\}) + p(\{u, y\})$ , the three vertices can be included in  $I$ . If  $y \notin I$ , then  $nb(I \cup \{u\}) \leq nb(I \setminus \{u\})$  regardless of whether  $x \in I$ . If  $y \in I$ , then  $nb(I \cup \{u\}) \geq nb(I \setminus \{u\})$  regardless of whether  $x \in I$ . In other words, there exists a vertex set  $S \in MGIS(G)$  that includes  $u$  iff there exists a vertex set  $S' \in MGIS(G')$  such that  $y \in S'$ . It is easy to verify  $\alpha(G') + w(u) = \alpha(G)$  in all combinations of  $x, y, u$  that could appear in a set in  $MGIS(G)$ .

When  $w(u) < 0$  and  $w(u) < p(\{u, x\}) + p(\{u, y\})$ , the three vertices can not be included in  $I$ .  $u$  is in  $I$  iff  $y$  is included and  $x$  is not included in  $I$ . In other words, there exists a vertex set  $S \in MGIS(G)$  that includes  $u$  iff there exists a vertex set  $S' \in MGIS(G')$  such that  $x \notin S'$  and  $y \in S'$ . It is easy to verify  $\alpha(G') = \alpha(G)$  in all combinations of  $x, y, u$  that could appear in a set in  $MGIS(G)$ .

Case 3:  $w(u) < p(\{u, y\})$ . When  $w(u) \geq 0$ ,  $u$  is in at least one set  $I \in MGIS(G)$  iff neither  $x$  nor  $y$  is included in  $I$ . In other words, there exists a vertex set  $S \in MGIS(G)$  that includes  $u$  iff there exists a vertex set  $S' \in MGIS(G')$  such that  $x \notin S'$  and  $y \notin S'$ . It is easy to verify  $\alpha(G') + w(u) = \alpha(G)$  in all combinations of  $x, y, u$  that could appear in a set in  $MGIS(G)$ .

When  $w(u) < 0$  and  $w(u) < p(\{u, x\}) + p(\{u, y\})$ ,  $u$  is not in any  $I \in MGIS(G)$  because otherwise  $nb(I \setminus \{u\}) > nb(I)$  without containing permanent edges, a contradiction. Therefore, we can remove  $u$  directly.

When  $w(u) < 0$  and  $w(u) \geq p(\{u, x\}) + p(\{u, y\})$ ,  $u$  is in at least one set  $I \in MGIS(G)$  iff both  $x$  and  $y$  are included in  $I$ . In other words, there exists a vertex set  $S \in MGIS(G)$  that includes  $u$  iff there exists a vertex set  $S' \in MGIS(G')$  such that  $x \in S'$  and  $y \in S'$ . It is easy to verify  $\alpha(G') = \alpha(G)$  in all combinations of  $x, y, u$  that could appear in a set in  $MGIS(G)$ .  $\square$

*Proof of R10.* Observe that there exists a vertex set  $I \in MGIS(G)$  that includes at least one of  $x, u$  must be included in  $I$ . Because if none of them is included in at least one set  $I \in MGIS(G)$ , then  $nb(I \cup \{u\}) - nb(I) \geq w(u) - \sum_{v \in N_r(u)} \max(0, p(\{u, v\})) \geq 0$  and therefore  $I \cup \{u\} \in MGIS(G)$ .

Given an arbitrary  $I \in MGIS(G)$ . Furthermore,  $x$  and  $u$  cannot be both included in  $I$  since  $\{u, x\} \in E_p$ . In summary, there are two possible states in  $I$ : either  $x \in I, u \notin I$  or  $u \in I, x \notin I$ . Therefore, there exists a vertex set  $S \in MGIS(G)$  that includes  $u$  iff there exists a vertex set  $S' \in MGIS(G')$  such that  $x \notin S'$ . It is easy to verify  $\alpha(G') + w(u) = \alpha(G)$  in all combinations of  $x, u$  that could appear in a set in  $MGIS(G)$ .  $\square$

*Proof of R11.* Observe that there exists a vertex set  $I \in MGIS(G)$  that includes at least one of  $u, x, y$ . If none of them is included in  $I$ , then  $nb(I \cup \{u\}) - nb(I) \geq w(u) - \sum_{v \in N_r(u)} \max(0, p(\{u, v\})) \geq 0$ . In addition, at most one of  $u, x, y$  can be included in  $I$  because  $\{u, x\} \in E_p, \{u, y\} \in E_p, \{x, y\} \in E_p$ .

Given an arbitrary  $I \in MGIS(G)$ . When  $w(u) \geq \tilde{w}(x)$ . If one of  $x, y$  is included in  $I$ , say  $x$ , then  $nb(I \cup \{u\} \setminus \{x\}) \geq nb(I)$ . In summary,  $u$  must be included in at least one set in  $MGIS(G)$ .

When  $\tilde{w}(y) \leq w(u) < \tilde{w}(x)$ . If  $y$  is included in  $I$ , then  $u \notin I$  and  $nb(I \cup \{u\} \setminus \{y\}) \geq nb(I)$ . Therefore, there is a vertex set  $I' \in MGIS(G)$  such that  $y \notin I'$  and exactly one of  $u, x$  is included in  $I'$ . We conclude that there exists a vertex set  $S \in MGIS(G)$  such that  $u \in S$  iff there exists a vertex set  $S' \in MGIS(G')$  such that  $x \notin S'$ . It is easy to verify  $\alpha(G') + w(u) = \alpha(G)$  in all combinations of  $x, y, u$  that could appear in a set in  $MGIS(G)$ .

When  $w(u) < \tilde{w}(y)$ .  $u$  is in at least one set  $I \in MGIS(G)$  iff both  $x, y$  are not included in  $I$ . In other words, there exists a vertex set  $S \in MGIS(G)$  that includes  $u$  iff there exists a vertex set  $S' \in MGIS(G')$  such that  $x \notin S'$  and  $y \notin S'$ . It is easy to verify  $\alpha(G') + w(u) = \alpha(G)$  in all combinations of  $x, y, u$  that could appear in a set in  $MGIS(G)$ .  $\square$

*Proof of R12.* Given an arbitrary  $I \in MGIS(G)$ .

When  $w(u) \geq \tilde{w}(v) + w^+(N(u) \setminus N_p[v])$ . If  $v \in I$ , then  $u \notin I$ . We can replace  $N(u) \cap I$  with  $u$  to get a larger or equal net benefit because  $nb(I \cup \{u\} \setminus N(u)) - nb(I) \geq w(u) - \tilde{w}(v) + w^+(N(u) \setminus N_p[v]) \geq w(u) - \tilde{w}(v) + w^+(N(u) \cap I) \geq 0$ . Therefore,  $I \cup \{u\} \setminus N(u) \in MGIS(G)$ . Since  $v \in N_p(u)$ , there must exist at least one set in  $MGIS(G)$  that does not include  $v$ .

When  $w(u) \geq \tilde{w}(v) + w^+(N_p(u) \setminus N_p[v]) + \sum_{x \in N_r(u) \setminus N_p(v)} \max(0, p(\{u, x\}))$ . If  $v \in I$ , then  $u \notin I$ . We can replace  $N_p(u) \cap I$  with  $u$  to get a larger net benefit because  $nb(I \cup \{u\} \setminus N_p(u)) - nb(I) \geq w(u) - \tilde{w}(v) + w^+(N_p(u) \setminus N_p(v)) + \sum_{x \in N_r(u) \setminus N_p(v)} \max(0, p(\{u, x\})) \geq w(u) - \tilde{w}(v) + w^+(N(u) \cap I) + \sum_{x \in N_r(u) \cap I} \max(0, p(\{u, x\})) \geq 0$ . Since  $v \in N_p(u)$ , there must exist a set in  $MGIS(G)$  that does not include  $v$ .  $\square$

*Proof of R13.* Assume, for the sake of contradiction, that neither  $u$  nor  $v$  is included in any set in  $MGIS(G)$ . If for any  $I \in MGIS(G)$ ,  $N(v) \cap I = \emptyset$ , then  $I \cup \{v\} \in MGIS(G)$  because  $nb(I \cup \{v\}) \geq$

$nb(I)$  without containing permanent edges, a contradiction. Note that  $u \notin N(v) \cap I$ . If there exists a set  $I \in MGIS(G)$  such that  $N(v) \cap I \neq \emptyset$ , then  $w(v) \geq w^+(N(v)) - \max(0, w(u)) \geq w^+(S)$ .  $nb(I \cup \{v\} \setminus N(v)) \geq nb(I)$  without containing permanent edges, again a contradiction. Therefore, there exists a set in  $MGIS(G)$  that includes at least one of  $u, v$ . We conclude that  $N_p(u) \cap N_p(v)$  must not be included in at least one set in  $MGIS(G)$ .  $\square$

*Proof of R14.* Given an arbitrary  $I \in MGIS(G)$ . If  $u$  is included in  $I$ , then  $N_p(v) \cap I = \emptyset$ .  $I \cup \{v\} \in MGIS(G)$  because  $nb(I \cup \{v\}) - nb(I \setminus \{v\}) = w(v) - \sum_{x \in N_r(v)} \max(0, p(\{v, x\})) \geq 0$ . The same argument holds when  $v$  is included in  $I$ . Therefore, we can fold  $u$  and  $v$  into a vertex  $v'$ . There exists  $S \in MGIS(G)$  such that  $u \in S$  and  $v \in S$  iff there exists  $S' \in MGIS(G')$  such that  $v' \in S'$ .  $\square$

## 2. Examples of Reduction 8 and 9

Examples of  $R8$  are presented in Figure 1. For example, in the first plot,  $u$  satisfies case 1 and  $w(u) \geq 0$ . Then by  $R8.1.1$ , we can remove  $u$  from the original graph  $G$  (left) to get the reduced graph  $G'$  (right) and  $\alpha(G) = \alpha(G') + 10$ . Similarly, examples of  $R9$  are presented in Figure 2.

**Figure 1** Examples of  $R8$ . Suppose that vertex  $u$  is adjacent to  $x$  and  $y$ , and  $\{x, y\} \in E_p$ .  $G_R$  represents the residual graph  $G[V \setminus \{u, x, y\}]$ .  $\alpha$  and  $\alpha'$  indicate the optimal objective value in the original graph and the graph after reduction, respectively.

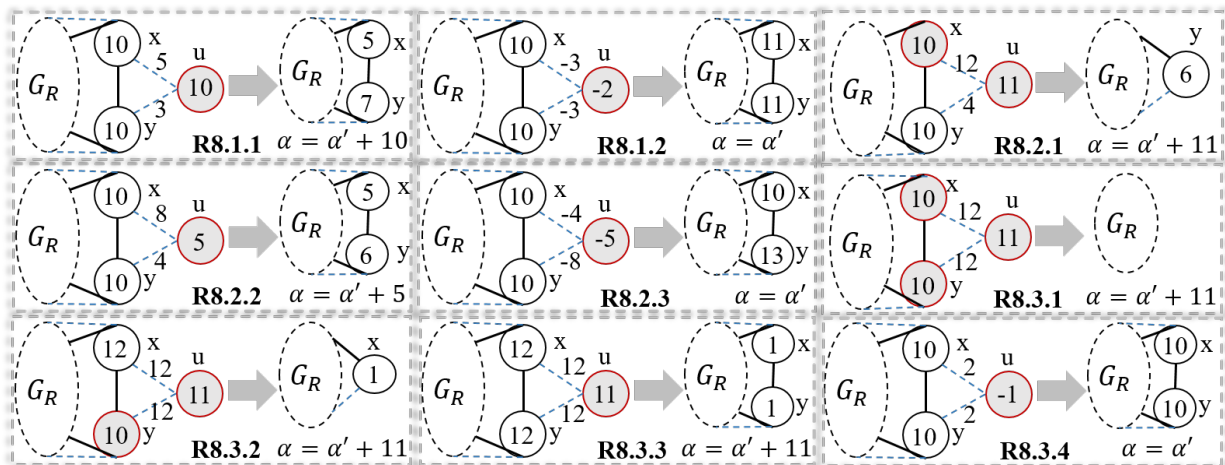

**Figure 2** Examples of R9. Suppose that vertex  $u$  is adjacent to vertices  $x$  and  $y$ , and  $\{x, y\} \in E_r$  or  $\{x, y\} \notin E_r$ .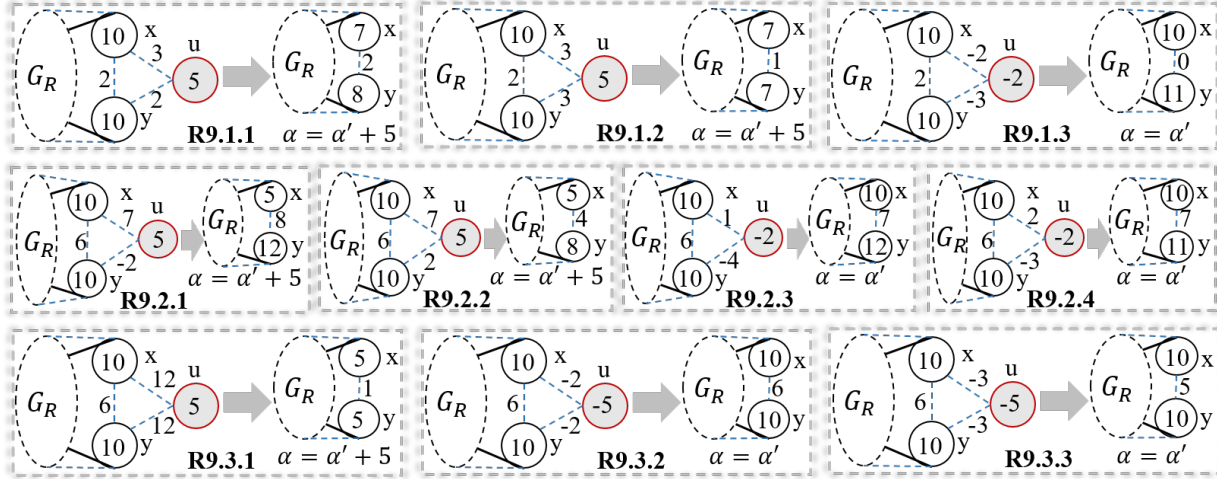

### 3. Integer Programming of the GIS Problem

The GIS problem can be conveniently formulated as follows (Colombi et al. 2017):

$$\alpha(G) = \max \sum_{i \in V} w(i)x_i - \sum_{\{i,j\} \in E_r} p(\{i,j\})y_{ij} \quad (1)$$

$$\text{s.t. } x_i + x_j \leq 1 \quad \{i,j\} \in E_p \quad (2)$$

$$x_i + x_j - y_{ij} \leq 1 \quad \{i,j\} \in E_r \quad (3)$$

$$x_i \geq y_{ij}, x_j \geq y_{ij} \quad \{i,j\} \in E_r \quad (4)$$

$$x_i \in \{0, 1\} \quad i \in V \quad (5)$$

$$y_{ij} \in \{0, 1\} \quad \{i,j\} \in E_r \quad (6)$$

where binary variables  $x_i$  indicate whether the vertex  $i$  is selected, and binary variables  $y_{ij}$  indicate whether the removable edge  $\{i, j\}$  is included.

### 4. Detailed Computational Results

The detailed comparative results on SET-2 and SET-3 are presented in Tables 1 and 2. The first four columns list instance information. The remaining columns show the best-known objective value ( $BKV$ ), the number of vertices in the  $BKV$  solution ( $|V_I|$ ), the mean running time for the heuristic algorithm to first hit the  $BKV$  ( $htime$ ), the kernel graph size ( $|V_{ker}|$ ) and the time of generating a kernel ( $time_{ker}$ ). The last two rows report statistical results. Values marked with \* denote the optimal objective value. Note that RLS's  $htime$  includes the pre-processing time for building graph kernels. The detailed ablation results on SET-2 and SET-3 are presented in Tables 3.

**Table 1 Comparative results of RLS on SET-2 instances**

| Instance                   | V      | E <sub>p</sub> | E <sub>r</sub> | CPLEX           |                |          | LA-B&B      |                |          | ALS            |                |          | RLS             |                |          |                  |                         |     |
|----------------------------|--------|----------------|----------------|-----------------|----------------|----------|-------------|----------------|----------|----------------|----------------|----------|-----------------|----------------|----------|------------------|-------------------------|-----|
|                            |        |                |                | BKV             | V <sub>f</sub> | htime(s) | BKV         | V <sub>f</sub> | htime(s) | BKV            | V <sub>f</sub> | htime(s) | BKV             | V <sub>f</sub> | htime(s) | V <sub>ker</sub> | time <sub>ker</sub> (s) |     |
| bio-yeast                  | 1,458  | 980            | 968            | <b>68,574*</b>  | 1,111          | <1       | 66,545      | 1,062          | 2        | 68,572         | 1,113          | 9        | <b>68,574*</b>  | 1,111          | <1       | 0                | <1                      |     |
| soc-wiki-Vote              | 889    | 727            | 2,187          | <b>37,358*</b>  | 648            | <1       | 35,973      | 615            | <1       | <b>37,358*</b> | 648            | 8        | <b>37,358*</b>  | 648            | <1       | 0                | <1                      |     |
| vc-exact_131               | 2,980  | 1,191          | 4,169          | <b>109,641*</b> | 2,098          | <1       | 107,812     | 2,045          | 14       | 109,392        | 2,121          | 14       | <b>109,641*</b> | 2,098          | <1       | 0                | <1                      |     |
| web-edu                    | 3,031  | 4,813          | 1,661          | <b>114,140*</b> | 1,752          | <1       | 109,856     | 1,644          | 10       | 113,781        | 1,746          | 16       | <b>114,140*</b> | 1,753          | <1       | 98               | <1                      |     |
| MANN_a81                   | 3,321  | 3,118          | 3,362          | <b>117,327*</b> | 2,084          | <1       | 114,616     | 1,999          | 16       | 116,907        | 2,125          | 14       | <b>117,327*</b> | 2,084          | <1       | 0                | <1                      |     |
| tech-routers-rf            | 2,113  | 1,539          | 5,093          | <b>97,799*</b>  | 1,668          | <1       | 93,690      | 1,588          | 54       | <b>97,799*</b> | 1,668          | 11       | <b>97,799*</b>  | 1,667          | <1       | 0                | <1                      |     |
| vc-exact_039               | 6,795  | 2,574          | 8,046          | <b>259,542*</b> | 5,018          | <1       | 254,941     | 4,908          | 253      | 258,137        | 5,164          | 9        | <b>259,542*</b> | 5,018          | <1       | 0                | <1                      |     |
| ca-GrQc                    | 4,158  | 3,179          | 10,243         | <b>174,782*</b> | 2,991          | 9        | 167,846     | 2,871          | 45       | 174,654        | 2,997          | 15       | <b>174,782*</b> | 2,994          | 11       | 282              | <1                      |     |
| vc-exact_038               | 786    | 10,321         | 3,703          | <b>12,015*</b>  | 208            | 589      | 10,406      | 168            | 1,994    | 12,014         | 208            | 12       | <b>12,015*</b>  | 207            | 4        | 697              | <1                      |     |
| vc-exact_078               | 11,349 | 4,289          | 13,450         | <b>438,671*</b> | 8,330          | <1       | 431,371     | 8,128          | 1,074    | 435,412        | 8,671          | <1       | <b>438,671*</b> | 8,330          | <1       | 0                | <1                      |     |
| vc-exact_087               | 13,590 | 5,126          | 16,114         | <b>518,500*</b> | 10,025         | 2        | 509,734     | 9,809          | 2,319    | 517,500        | 10,083         | 2        | <b>518,500*</b> | 10,026         | <1       | 0                | <1                      |     |
| vc-exact_107               | 6,402  | 15,646         | 5,594          | <b>407,878*</b> | 6,763          | <1       | 396,456     | 6,488          | 10,646   | 400,223        | 6,846          | 1        | <b>407,878*</b> | 6,763          | <1       | 0                | <1                      |     |
| vc-exact_151               | 15,783 | 12,144         | 12,519         | <b>530,138*</b> | 9,526          | 2        | 516,445     | 9,135          | 2,402    | 522,462        | 9,764          | 1        | <b>530,138*</b> | 9,526          | <1       | 0                | <1                      |     |
| vc-exact_167               | 15,783 | 18,235         | 6,428          | <b>465,178*</b> | 7,797          | 1        | 449,579     | 7,438          | 10,469   | 457,272        | 7,923          | 2        | <b>465,178*</b> | 7,797          | <1       | 0                | <1                      |     |
| bio-dimela                 | 7,393  | 18,897         | 6,672          | <b>302,992*</b> | 4,952          | <1       | 280,897     | 4,474          | 170      | 302,449        | 4,959          | 10       | <b>302,992*</b> | 4,951          | <1       | 44               | <1                      |     |
| vc-exact_011               | 9,877  | 19,102         | 6,871          | <b>303,793*</b> | 5,369          | 1        | 286,137     | 4,950          | 4,818    | 301,789        | 5,487          | 7        | <b>303,793*</b> | 5,387          | <1       | 172              | <1                      |     |
| web-spam                   | 4,767  | 8,089          | 28,386         | <b>190,507*</b> | 3,285          | 4.61     | 180,446     | 3,130          | 53       | 190,344        | 3,299          | 14       | <b>190,507*</b> | 3,289          | 13       | 487              | <1                      |     |
| vc-exact_026               | 6,140  | 27,159         | 9,608          | <b>201,509*</b> | 3,887          | 1        | 177,902     | 3,372          | 668      | 201,316        | 3,922          | 17       | <b>201,509*</b> | 3,900          | <1       | 300              | <1                      |     |
| vc-exact_001               | 6,160  | 19,655         | 20,552         | <b>215,941*</b> | 4,129          | 2        | 194,984     | 3,709          | 9,575    | 215,668        | 4,175          | 13       | <b>215,941*</b> | 4,128          | <1       | 134              | <1                      |     |
| vc-exact_024               | 7,620  | 11,367         | 35,926         | <b>236,109*</b> | 4,632          | 10,783   | 226,540     | 4,438          | 244      | 235,440        | 4,735          | 14       | <b>236,109*</b> | 4,659          | 12       | 1,255            | <1                      |     |
| C1000.9                    | 1,000  | 11,989         | 37,432         | 5,263           | 99             | 10,800   | 6,104       | 116            | 430      | 7,229          | 126            | 12       | <b>7,239</b>    | 125            | 10       | 1,000            | <1                      |     |
| tech-WHOIS                 | 7,476  | 42,181         | 14,762         | <b>325,584*</b> | 5,368          | 5        | 309,903     | 5,050          | 218      | 325,327        | 5,367          | 14       | <b>325,581*</b> | 5,371          | 13       | 338              | <1                      |     |
| p-hat700-3                 | 700    | 30,398         | 31,242         | 4,025           | 68             | 10,800   | 3,030       | 52             | 7,436    | <b>4,473</b>   | 78             | <1       | <b>4,473</b>    | 78             | <1       | 700              | <1                      |     |
| vc-exact_008               | 7,537  | 35,678         | 37,155         | <b>247,091*</b> | 4,800          | 3        | 210,126     | 4,089          | 9,093    | 246,771        | 4,839          | 14       | <b>247,091*</b> | 4,810          | <1       | 574              | <1                      |     |
| keller5                    | 776    | 17,800         | 56,910         | 2,373           | 58             | 10,800   | 2,860       | 54             | 6,327    | <b>3,877</b>   | 69             | 1        | <b>3,877</b>    | 69             | 2        | 776              | <1                      |     |
| vc-exact_194               | 1,150  | 39,520         | 41,331         | 3,734           | 77             | 10,708   | 4,386       | 73             | 1,324    | <b>5,419</b>   | 86             | <1       | <b>5,419</b>    | 86             | <1       | 1,150            | <1                      |     |
| hamming10-4                | 1,024  | 66,369         | 23,231         | 3,256           | 52             | 8,108    | 3,073       | 45             | 2,069    | <b>3,660</b>   | 54             | <1       | <b>3,660</b>    | 54             | <1       | 1,024            | <1                      |     |
| brock800.2                 | 800    | 26,629         | 84,805         | 1,177           | 49             | 10,800   | 1,996       | 36             | 10       | <b>2,473</b>   | 44             | <1       | <b>2,473</b>    | 43             | <1       | 800              | <1                      |     |
| brock800.4                 | 800    | 26,831         | 85,126         | 1,583           | 48             | 10,800   | 1,979       | 39             | 7,215    | <b>2,501</b>   | 43             | <1       | <b>2,501</b>    | 42             | <1       | 800              | <1                      |     |
| ca-HepPh                   | 11,204 | 57,721         | 59,898         | <b>372,096</b>  | 6,094          | 10,800   | 348,738     | 5,571          | 422      | 370,779        | 6,083          | 6        | <b>372,079</b>  | 6,098          | 17       | 2,162            | <1                      |     |
| p-hat700-2                 | 700    | 90,788         | 32,134         | 2,870           | 41             | 10,140   | 2,345       | 37             | 2,078    | <b>2,971</b>   | 42             | <1       | <b>2,971</b>    | 42             | <1       | 700              | <1                      |     |
| vc-exact_196               | 1,534  | 93,273         | 32,809         | 3,916           | 62             | 10,800   | 4,273       | 57             | 66       | <b>5,321</b>   | 76             | <1       | <b>5,321</b>    | 76             | <1       | 1,534            | <1                      |     |
| p-hat700-1                 | 700    | 135,804        | 47,847         | 730             | 11             | 10,800   | <b>844*</b> | 11             | 5        | <b>844*</b>    | 11             | <1       | <b>844*</b>     | 11             | <1       | 700              | <1                      |     |
| ca-AstroPh                 | 17,903 | 47,135         | 149,837        | <b>604,288</b>  | 10,468         | 10,800   | 558,736     | 9,752          | 2,544    | 602,320        | 10,521         | 2        | <b>604,019</b>  | 10,491         | 14       | 4,985            | 1                       |     |
| C2000.9                    | 2,000  | 147,548        | 51,920         | 3,958           | 65             | 9,489    | 5,477       | 73             | 11       | <b>6,396</b>   | 86             | 3        | <b>6,396</b>    | 86             | 3        | 2,000            | <1                      |     |
| DSJC1000.5                 | 1,000  | 59,694         | 189,980        | 925             | 39             | 7,645    | 1,515       | 30             | 694      | <b>1,861</b>   | 32             | 1        | <b>1,861</b>    | 32             | <1       | 1,000            | <1                      |     |
| socfb-MIT                  | 6,402  | 123,064        | 128,166        | 7,098           | 124            | 10,800   | 110,677     | 1,779          | 20       | 129,807        | 2,142          | 17       | <b>129,917</b>  | 2,132          | 16       | 5,494            | <1                      |     |
| p-hat1500-3                | 1,500  | 66,206         | 210,800        | 4,097           | 132            | 10,800   | 3,877       | 83             | 704      | <b>7,501</b>   | 148            | 14       | <b>7,501</b>    | 148            | 16       | 1,500            | <1                      |     |
| vc-UCSB37                  | 14,917 | 356,918        | 125,297        | 16,708          | 287            | 10,800   | 219,965     | 3,286          | 256      | 254,965        | 4,013          | 16       | <b>255,924</b>  | 3,994          | 22       | 13,655           | 3                       |     |
| socfb-Duke14               | 9,885  | 374,731        | 131,706        | 11,565          | 198            | 10,800   | 125,940     | 1,887          | 39       | 151,169        | 2,415          | 15       | <b>151,365</b>  | 2,390          | 18       | 9,003            | 4                       |     |
| p-hat1500-2                | 1,500  | 411,372        | 143,918        | 3,542           | 53             | 10,800   | 2,611       | 43             | 2,150    | <b>4,253</b>   | 68             | <1       | <b>4,253</b>    | 68             | <1       | 1,500            | <1                      |     |
| socfb-Stanford3            | 11,586 | 136,823        | 431,486        | 7,250           | 122            | 10,800   | 215,381     | 3,932          | 265      | 251,350        | 4,441          | 12       | <b>251,932</b>  | 4,436          | 14       | 9,380            | 2                       |     |
| socfb-UConn                | 17,206 | 448,038        | 156,829        | 16,996          | 279            | 10,800   | 231,718     | 3,471          | 322      | 274,637        | 4,329          | 12       | <b>275,320</b>  | 4,299          | 18       | 16,025           | 5                       |     |
| p-hat1500-1                | 1,500  | 411,744        | 427,583        | 0               | 0              | 10,800   | 1,184       | 18             | 5,499    | <b>1,287</b>   | 19             | <1       | <b>1,287</b>    | 19             | <1       | 1,500            | <1                      |     |
| C2000.5                    | 2,000  | 489,894        | 509,270        | 0               | 0              | 10,800   | 1,581       | 24             | 865      | <b>1,849</b>   | 26             | 2        | <b>1,849</b>    | 26             | 6        | 2,000            | 1                       |     |
| keller6                    | 3,361  | 759,816        | 266,766        | 0               | 0              | 10,800   | 3,545       | 55             | 1,561    | <b>5,236</b>   | 73             | 10       | <b>5,236</b>    | 73             | 16       | 3,361            | <1                      |     |
| C4000.5                    | 4,000  | 1,957,884      | 2,039,848      | 0               | 0              | 10,800   | 1,611       | 25             | 1,659    | 1,948          | 28             | 20       | <b>1,952</b>    | 28             | 22       | 4,000            | 9                       |     |
| # of best / # of instances |        |                |                | 24/47           | -              | -        | 1/47        | -              | -        | 18/47          | -              | -        | 41/47           | -              | -        | -                | -                       | -   |
| average running time(s)    |        |                |                | -               | -              | 5,819.2  | -           | -              | 2,087.4  | -              | -              | 7.9      | -               | -              | 5.9      | -                | -                       | 1.4 |

**Table 2 Comparative results of RLS on SET-3 instances**

| Instance    | V       | E <sub>p</sub> | E <sub>r</sub> | CPLEX              |                |          | LA-B&B        |                |          | ALS            |                |          | RLS                |                |          |                  |                         |
|-------------|---------|----------------|----------------|--------------------|----------------|----------|---------------|----------------|----------|----------------|----------------|----------|--------------------|----------------|----------|------------------|-------------------------|
|             |         |                |                | BKV                | V <sub>f</sub> | htime(s) | BKV           | V <sub>f</sub> | htime(s) | BKV            | V <sub>f</sub> | htime(s) | BKV                | V <sub>f</sub> | htime(s) | V <sub>ker</sub> | time <sub>ker</sub> (s) |
| foodweb-wet | 128     | 1,509          | 566            | <b>2,464*</b>      | 44             | <1       | <b>2,464*</b> | 44             | 8        | <b>2,464*</b>  | 44             | <1       | <b>2,464*</b>      | 44             | <1       | 125              | <1                      |
| foodweb-dry | 128     | 1,571          | 535            | <b>2,226*</b>      | 42             | <1       | <b>2,226*</b> | 42             | 8        | <b>2,226*</b>  | 42             | <1       | <b>2,226*</b>      | 42             | <1       | 125              | <1                      |
| USAir97     | 332     | 1,589          | 537            | <b>10,308*</b>     | 194            | <1       | 9,507         | 178            | 407      | <b>10,308*</b> | 194            | <1       | <b>10,308*</b>     | 194            | <1       | 0                | <1                      |
| powergrid   | 4,941   | 1,727          | 4,867          | <b>193,339*</b>    | 3,710          | <1       | 190,537       | 3,684          | 108      | 193,095        | 3,754          | 59       | <b>193,339*</b>    | 3,537          | <1       | 0                | <1                      |
| CondMat     | 23,133  | 46,769         | 46,670         | <b>711,517*</b>    | 12,821         | 12       | 685,442       | 12,061         | 5,749    | 705,901        | 1,306          | 14       | 711,334            | 12,870         | 45       | 1,648            | <1                      |
| Email       | 265,009 | 91,093         | 273,388        | <b>13,054,427*</b> | 257,435        | 118      | OOM           | -              | -        | OOM            | -              | -        | <b>13,054,427*</b> | 257,394        | 1        | 0                | 1                       |
| Epinion     | 75,879  | 202,653        | 203,087        | <b>3,052,059*</b>  | 57,976         | 60       | OOM           | -              | -        | 3,038,533      | 58,267         | 18       | <b>3,052,059*</b>  | 58,008         | 1        | 253              | 1                       |
| Dblp        | 317,080 | 787,268        | 262,598        | <b>9,737,911*</b>  | 171,421        | 790      | OOM           | -              | -        | OOM            | -              | -        | 9,734,653          | 171,403        | 64       | 11,851           | 11                      |
| cnr-2000    | 325,557 | 685,686        | 2,053,283      | 13,367,460         | 260,331        | 10,800   | OOM           | -              | -        | OOM            | -              | -        | <b>13,368,670</b>  | 260,716        | 482      | 59,052           |                         |

**Table 3** Comparative results of algorithms with or without reduction rules

| Instance                   | V          | V <sub>ker</sub> | CPLEX               |          |                     |          | LA-B&B            |          |                     |         | RLS               |             |                     |          |
|----------------------------|------------|------------------|---------------------|----------|---------------------|----------|-------------------|----------|---------------------|---------|-------------------|-------------|---------------------|----------|
|                            |            |                  | without reduction   |          | with reduction      |          | without reduction |          | with reduction      |         | without reduction |             | with reduction      |          |
|                            |            |                  | BKV                 | htime(s) | BKV                 | htime(s) | BKV               | htime(s) | BKV                 | htimes  | BKV               | htime(s)    | BKV                 | htime(s) |
| bio-yeast                  | 1,458      | 0                | <b>68,574*</b>      | <1       | <b>68,574*</b>      | <1       | 66,545            | 2        | <b>68,574*</b>      | <1      | <b>68,574*</b>    | 1           | <b>68,574*</b>      | <1       |
| soc-wiki-Vote              | 889        | 0                | <b>37,358*</b>      | <1       | <b>37,358*</b>      | <1       | 35,973            | <1       | <b>37,358*</b>      | <1      | <b>37,358*</b>    | 1           | <b>37,358*</b>      | <1       |
| vc-exact_131               | 2,980      | 0                | <b>109,641*</b>     | <1       | <b>109,641*</b>     | <1       | 107,812           | 14       | <b>109,641*</b>     | <1      | 109,567           | 9           | <b>109,641*</b>     | <1       |
| web-edu                    | 3,031      | 98               | <b>114,140*</b>     | <1       | <b>114,140*</b>     | <1       | 109,856           | 10       | <b>114,140*</b>     | 21      | 114,080           | 12          | <b>114,140*</b>     | <1       |
| MANN_a81                   | 3,321      | 0                | <b>117,327*</b>     | <1       | <b>117,327*</b>     | <1       | 114,616           | 16       | <b>117,327*</b>     | <1      | 117,275           | 14          | <b>117,327*</b>     | <1       |
| tech-routers-rf            | 2,113      | 0                | <b>97,799*</b>      | <1       | <b>97,799*</b>      | <1       | 93,690            | 54       | <b>97,799*</b>      | <1      | <b>97,799*</b>    | 1           | <b>97,799*</b>      | <1       |
| vc-exact_039               | 6,795      | 0                | <b>259,542*</b>     | <1       | <b>259,542*</b>     | <1       | 254,941           | 253      | <b>259,542*</b>     | <1      | 259,475           | 13          | <b>259,542*</b>     | <1       |
| ca-GrQc                    | 4,158      | 282              | <b>174,782*</b>     | 9        | <b>174,782*</b>     | 6        | 167,846           | 45       | 174,525             | 2,998   | 174,768           | 7           | <b>174,782*</b>     | 11       |
| vc-exact_038               | 786        | 697              | <b>12,015*</b>      | 589      | <b>12,015*</b>      | 585      | 10,406            | 1,994    | 10,782              | 28      | <b>12,015*</b>    | 13          | <b>12,015*</b>      | 4        |
| vc-exact_078               | 11,349     | 0                | <b>438,671*</b>     | <1       | <b>438,671*</b>     | 1        | 431,371           | 1,074    | <b>438,671*</b>     | 1       | 438,306           | 16          | <b>438,671*</b>     | <1       |
| vc-exact_087               | 13,590     | 0                | <b>518,500*</b>     | 2        | <b>518,500*</b>     | <1       | 509,734           | 2,319    | <b>518,500*</b>     | <1      | 518,069           | 15          | <b>518,500*</b>     | <1       |
| vc-exact_107               | 6,402      | 0                | <b>407,878*</b>     | <1       | <b>407,878*</b>     | <1       | 396,456           | 10,646   | <b>407,878*</b>     | <1      | 406,379           | 14          | <b>407,878*</b>     | <1       |
| vc-exact_151               | 15,783     | 0                | <b>530,138*</b>     | 2        | <b>530,138*</b>     | <1       | 516,445           | 2,402    | <b>530,138*</b>     | <1      | 529,003           | 18          | <b>530,138*</b>     | <1       |
| vc-exact_167               | 15,783     | 0                | <b>465,178*</b>     | 1        | <b>465,178*</b>     | <1       | 449,579           | 10,469   | <b>465,178*</b>     | <1      | 463,446           | 12          | <b>465,178*</b>     | <1       |
| bio-dmela                  | 7,393      | 44               | <b>302,992*</b>     | <1       | <b>302,992*</b>     | <1       | 280,897           | 170      | <b>302,992*</b>     | <1      | 302,793           | 18          | <b>302,992*</b>     | <1       |
| vc-exact_011               | 9,877      | 172              | <b>303,793*</b>     | 1        | <b>303,793*</b>     | <1       | 286,137           | 4,818    | 303,589             | 1271    | 303,352           | 9           | <b>303,793*</b>     | <1       |
| web-spam                   | 4,767      | 487              | <b>190,507*</b>     | 4.61     | <b>190,507*</b>     | <1       | 180,446           | 53       | 189,897             | <1      | 190,460           | 18          | <b>190,507*</b>     | <1       |
| vc-exact_026               | 6,140      | 300              | <b>201,509*</b>     | 1        | <b>201,509*</b>     | <1       | 177,902           | 668      | 200,868             | <1      | 201,458           | 13          | 201,503             | <1       |
| vc-exact_001               | 6,160      | 134              | <b>215,941*</b>     | 2        | <b>215,941*</b>     | <1       | 194,984           | 9,575    | <b>215,941*</b>     | 2       | 215,934           | 13          | <b>215,941*</b>     | <1       |
| vc-exact_024               | 7,620      | 1,255            | <b>236,109</b>      | 10,783   | <b>236,109</b>      | 10,800   | 226,540           | 244      | 234,933             | 1       | 235,911           | 14          | 236,018             | 12       |
| C1000.9                    | 1,000      | 1,000            | 5,263               | 10,800   | 5,263               | 10,800   | 6,104             | 430      | 6,104               | 430     | 7,235             | 16          | <b>7,237</b>        | 10       |
| tech-WHOIS                 | 7,476      | 338              | <b>325,584*</b>     | 5        | <b>325,584*</b>     | <1       | 309,903           | 218      | 325,119             | 255     | 325,480           | 16          | 325,581             | 13       |
| p-hat700-3                 | 700        | 700              | 4,025               | 10,800   | 4,025               | 10,800   | 3,030             | 7,436    | 3,030               | 7,436   | <b>4,473</b>      | 1           | <b>4,473</b>        | <1       |
| vc-exact_008               | 7,537      | 574              | <b>247,091*</b>     | 3        | <b>247,091*</b>     | <1       | 210,126           | 9,093    | 245,289             | 6,627   | 247,036           | 16          | <b>247,091*</b>     | <1       |
| keller5                    | 776        | 776              | 2,373               | 10,800   | 2,373               | 10,800   | 2,860             | 6,327    | 2,860               | 6,327   | <b>3,877</b>      | 2           | <b>3,877</b>        | 2        |
| vc-exact_194               | 1,150      | 1,150            | 3,734               | 10,708   | 3,734               | 10,800   | 4,386             | 1,324    | 4,386               | 1,324   | <b>5,419</b>      | 2           | <b>5,419</b>        | <1       |
| hamming10-4                | 1,024      | 1,024            | 3,256               | 8,108    | 3,256               | 10,800   | 3,073             | 2,069    | 3,073               | 2,069   | <b>3,660</b>      | 1           | <b>3,660</b>        | <1       |
| brock800-2                 | 800        | 800              | 1,177               | 10,800   | 1,177               | 10,800   | 1,996             | 10       | 1,996               | 10      | <b>2,473</b>      | 1           | <b>2,473</b>        | <1       |
| brock800-4                 | 800        | 800              | 1,583               | 10,800   | 1,583               | 10,800   | 1,979             | 7,215    | 1,979               | 7,215   | <b>2,501</b>      | 1           | <b>2,501</b>        | <1       |
| ca-HepPh                   | 11,204     | 2,165            | 372,096             | 10,800   | <b>372,229</b>      | 10,800   | 348,738           | 422      | 368,637             | 2       | 372,079           | 14          | 372,079             | 17       |
| p-hat700-2                 | 700        | 700              | 2,870               | 10,140   | 2,870               | 10,140   | 2,345             | 2,078    | 2,345               | 2,078   | <b>2,971</b>      | 1           | <b>2,971</b>        | <1       |
| vc-exact_196               | 1,534      | 1,534            | 3,916               | 10,800   | 3,916               | 10,800   | 4,273             | 66       | 4,273               | 66      | <b>5,321</b>      | 2           | <b>5,321</b>        | <1       |
| p-hat700-1                 | 700        | 700              | 730                 | 10,800   | 730                 | 10,800   | <b>844*</b>       | 5        | <b>844*</b>         | 5       | <b>844*</b>       | 1           | <b>844*</b>         | <1       |
| ca-AstroPh                 | 17,903     | 4,985            | 604,288             | 10,800   | <b>604,342</b>      | 10,800   | 558,736           | 2,544    | 593,899             | 37      | 603,732           | 15          | 603,945             | 14       |
| C2000.9                    | 2,000      | 2,000            | 3,958               | 9,489    | 3,958               | 10,800   | 5,477             | 11       | 5,477               | 11      | <b>6,396</b>      | 3           | <b>6,396</b>        | 3        |
| DSJC1000.5                 | 1,000      | 1,000            | 925                 | 7,645    | 925                 | 10,800   | 1,515             | 694      | 1,515               | 694     | <b>1,861</b>      | 1           | <b>1,861</b>        | <1       |
| socfb-MIT                  | 6,402      | 5,494            | 7,098               | 10,800   | 118,114             | 10,800   | 110,677           | 20       | 113,623             | 10      | 129,831           | 16          | 129,872             | 16       |
| p-hat1500-3                | 1,500      | 1,500            | 4,097               | 10,800   | 4,097               | 10,800   | 3,877             | 704      | 3,877               | 704     | 7,500             | 15          | <b>7,501</b>        | 16       |
| socfb-UCSB37               | 14,917     | 13,655           | 16,708              | 10,800   | 57,084              | 10,800   | 219,965           | 256      | 223,780             | 150     | 255,887           | 21          | <b>255,898</b>      | 22       |
| socfb-Duke14               | 9,885      | 9,003            | 11,565              | 10,800   | 127,145             | 10,800   | 125,940           | 39       | 127,269             | 2,231   | 151,321           | 14          | <b>151,326</b>      | 18       |
| p-hat1500-2                | 1,500      | 1,500            | 3,542               | 10,800   | 3,542               | 10,800   | 2,611             | 2,150    | 2,611               | 2,150   | <b>4,253</b>      | 1           | <b>4,253</b>        | <1       |
| socfb-Stanford3            | 11,586     | 9,380            | 7,250               | 10,800   | 127,708             | 10,800   | 215,381           | 265      | 223,398             | 7,756   | 251,788           | 19          | <b>251,833</b>      | 14       |
| socfb-UConn                | 17,206     | 16,025           | 16,996              | 10,800   | 51,328              | 10,800   | 231,718           | 322      | 235,104             | 240     | 275,006           | 16          | <b>275,034</b>      | 20       |
| p-hat1500-1                | 1,500      | 1,500            | 0                   | 10,800   | 0                   | 10,800   | 1,184             | 5,499    | 1,184               | 5,499   | <b>1,287</b>      | 2           | <b>1,287</b>        | 1        |
| C2000.5                    | 2,000      | 2,000            | 0                   | 10,800   | 0                   | 10,800   | 1,581             | 865      | 1,581               | 865     | <b>1,849</b>      | 5           | <b>1,849</b>        | 6        |
| keller6                    | 3,361      | 3,361            | 0                   | 10,800   | 0                   | 10,800   | 3,545             | 1,561    | 3,545               | 1,561   | 5,229             | 19          | <b>5,236</b>        | 16       |
| C4000.5                    | 4,000      | 4,000            | 0                   | 10,800   | 0                   | 10,800   | 1,611             | 1,659    | 1,611               | 1,659   | <b>1,951</b>      | 15          | <b>1,951</b>        | 22       |
| foodweb-wet                | 128        | 125              | <b>2,464*</b>       | <1       | <b>2,464*</b>       | <1       | <b>2,464*</b>     | 8        | <b>2,464*</b>       | 6       | <b>2,464*</b>     | <1          | <b>2,464*</b>       | <1       |
| foodweb-dry                | 128        | 125              | <b>2,226*</b>       | <1       | <b>2,226*</b>       | <1       | <b>2,226*</b>     | 8        | <b>2,226*</b>       | 8       | <b>2,226*</b>     | <1          | <b>2,226*</b>       | <1       |
| USAir97                    | 332        | 0                | <b>10,308*</b>      | <1       | <b>10,308*</b>      | <1       | 9,507             | 407      | <b>10,308*</b>      | <1      | <b>10,308*</b>    | <1          | <b>10,308*</b>      | <1       |
| powergrid                  | 4,941      | 0                | <b>193,339*</b>     | <1       | <b>193,339*</b>     | <1       | 190,537           | 108      | <b>193,339*</b>     | <1      | 193,194           | 52          | <b>193,339*</b>     | <1       |
| CondMat                    | 23,133     | 1,648            | <b>711,517*</b>     | 12       | <b>711,517*</b>     | <1       | 685,442           | 5,749    | 708,907             | 84      | 709,927           | 54          | 711,334             | 45       |
| Email                      | 265,009    | 0                | <b>13,054,427*</b>  | 118      | <b>13,054,427*</b>  | 1        | OOM               | –        | <b>13,054,427*</b>  | 1       | 13,054,390        | 69          | <b>13,054,427*</b>  | 1        |
| Epinion                    | 75,879     | 253              | <b>3,052,059*</b>   | 60       | <b>3,052,059*</b>   | 1        | OOM               | –        | 3,051,256           | 196     | 3,050,415         | 67          | <b>3,052,059*</b>   | 1        |
| Dblp                       | 317,080    | 11,851           | <b>9,737,911*</b>   | 790      | <b>9,737,911*</b>   | 39       | OOM               | –        | 9,715,860           | 307     | 9,577,609         | 46          | 9,734,653           | 64       |
| cnr-2000                   | 325,557    | 59,052           | 13,367,460          | 10,800   | <b>13,641,278</b>   | 10,800   | OOM               | –        | 11,347,241          | 10,796  | 13,361,167        | 84          | 13,368,670          | 482      |
| WikiTalk                   | 2,394,385  | 8                | <b>118,708,326*</b> | 3,566    | <b>118,708,326*</b> | 333      | OOM               | –        | <b>118,708,326*</b> | 333     | 118,672,055       | 56          | <b>118,708,326*</b> | 333      |
| BerkStan                   | 685,230    | 114,191          | 26,036,210          | 10,800   | <b>26,055,767</b>   | 10,800   | OOM               | –        | 22,591,394          | 1,031   | 25,813,846        | 200         | 26,031,704          | 1,112    |
| As-Skitter                 | 1,696,415  | 31,173           | 66,603,360          | 10,800   | <b>66,830,857</b>   | 10,800   | OOM               | –        | 65,907,243          | 10,512  | 59,886,304        | 200         | 66,582,254          | 723      |
| soc-pokec                  | 1,632,803  | 881,319          | 4,146,172           | 10,800   | 27,037,851          | 10,800   | OOM               | –        | OOM                 | –       | 36,540,838        | 350         | <b>43,999,402</b>   | 934      |
| LiveJ                      | 4,846,609  | 401,307          | 0                   | 10,800   | 163,061,840         | 10,800   | OOM               | –        | OOM                 | –       | 148,758,359       | 318         | <b>168,431,056</b>  | 904      |
| uk2002                     | 18,483,186 | 4,806,660        | 0                   | 100,000  | 567,666,923         | 100,000  | OOM               | –        | OOM                 | –       | 633,365,020       | 1,806       | <b>687,089,901</b>  | 7,678    |
| # of best / # of instances |            |                  | 31/62               | –        | 36/62               | –        | 3/62              | –        | 21/62               | –       | 22/62             | –           | 51/62               | –        |
| average running time(s)    |            |                  | –                   | 7,096.5  | –                   | 6,901.0  | –                 | 2,007.5  | –                   | 1,441.1 | –                 | <b>60.8</b> | –                   | 202.6    |
